# Supplementary material for: Synthesis of 3′-azido/-amino-xylobicyclonucleosides
Source: Royal Society of Chemistry journal article supplement (doi:10.1039/c5ra25222a), 2016-01-01
Supplement: c5ra25222a1.pdf [file c5ra25222a1.pdf]

## Supporting Information

### Synthesis of 3'-azido/-amino-xylobicyclonucleosides

Manish Kumar, Rajesh Kumar, Neha Rana and Ashok K. Prasad\*

*Bioorganic Laboratory, Department of Chemistry, University of Delhi, Delhi-110 007, India*  
[ashokenzyme@gmail.com](mailto:ashokenzyme@gmail.com)

|                                                                                                                      |            |
|----------------------------------------------------------------------------------------------------------------------|------------|
| <sup>1</sup> H- and <sup>13</sup> C-NMR spectra of compound <b>4</b> .....                                           | <b>S2</b>  |
| <sup>1</sup> H- and <sup>13</sup> C-NMR spectra of compound <b>5</b> .....                                           | <b>S3</b>  |
| <sup>1</sup> H- and <sup>13</sup> C-NMR spectra of compound <b>6</b> .....                                           | <b>S4</b>  |
| <sup>1</sup> H- <sup>1</sup> H COSY and <sup>1</sup> H- <sup>1</sup> H NOESY NMR spectra of compound <b>6</b> .....  | <b>S5</b>  |
| <sup>1</sup> H- and <sup>13</sup> C-NMR spectra of compound <b>7</b> .....                                           | <b>S6</b>  |
| <sup>1</sup> H- and <sup>13</sup> C-NMR spectra of compound <b>8a-8b</b> .....                                       | <b>S7</b>  |
| <sup>1</sup> H- and <sup>13</sup> C-NMR spectra of compound <b>9a</b> .....                                          | <b>S8</b>  |
| <sup>1</sup> H- and <sup>13</sup> C-NMR spectra of compound <b>9b</b> .....                                          | <b>S9</b>  |
| <sup>1</sup> H- and <sup>13</sup> C-NMR spectra of compound <b>9c</b> .....                                          | <b>S10</b> |
| <sup>1</sup> H- and <sup>13</sup> C-NMR spectra of compound <b>9d</b> .....                                          | <b>S11</b> |
| <sup>1</sup> H- and <sup>13</sup> C-NMR spectra of compound <b>1a</b> .....                                          | <b>S12</b> |
| <sup>1</sup> H- <sup>1</sup> H COSY and <sup>1</sup> H- <sup>13</sup> C HMQC NMR spectra of compound <b>1a</b> ..... | <b>S13</b> |
| <sup>1</sup> H- and <sup>13</sup> C-NMR spectra of compound <b>1b</b> .....                                          | <b>S14</b> |
| <sup>1</sup> H- <sup>1</sup> H COSY and <sup>1</sup> H- <sup>13</sup> C HSQC NMR spectra of compound <b>1b</b> ..... | <b>S15</b> |
| <sup>1</sup> H- and <sup>13</sup> C-NMR spectra of compound <b>1c</b> .....                                          | <b>S16</b> |
| <sup>1</sup> H- and <sup>13</sup> C-NMR spectra of compound <b>1d</b> .....                                          | <b>S17</b> |
| <sup>1</sup> H- and <sup>13</sup> C-NMR spectra of compound <b>2</b> .....                                           | <b>S18</b> |
| Single crystal X-ray structure of compound <b>7</b> and <b>1</b> .....                                               | <b>S19</b> |
| (Figure S1 and S2)                                                                                                   |            |
| Single crystal X-ray data of compound <b>7</b> and <b>1b</b> .....                                                   | <b>S20</b> |

(Table S1)

# <sup>1</sup>H- and <sup>13</sup>C-NMR spectra of compound 4

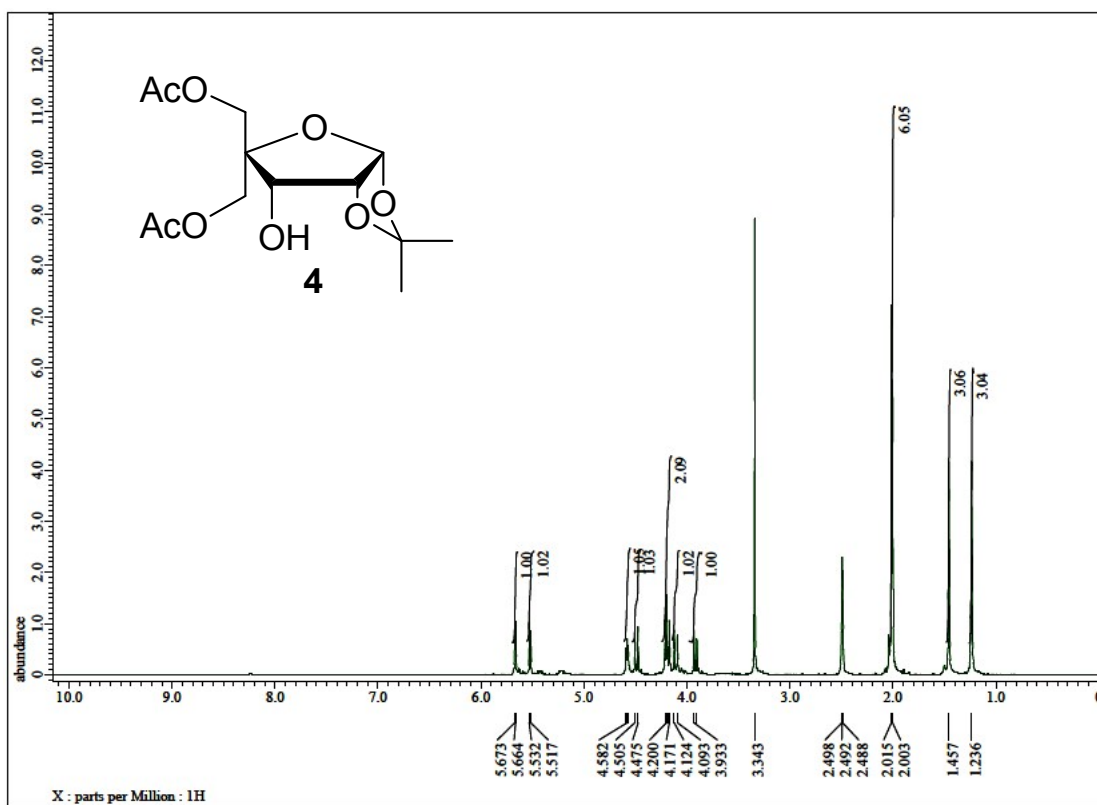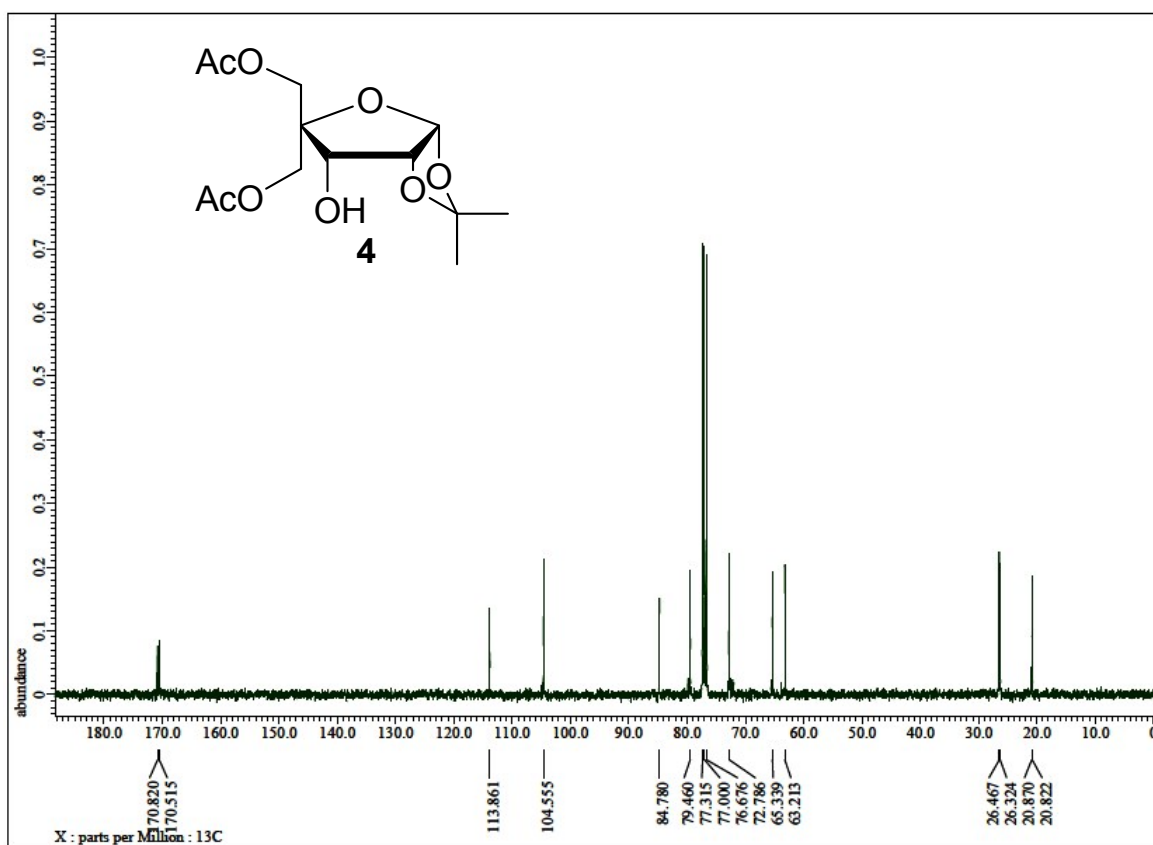

<sup>1</sup>H- and <sup>13</sup>C-NMR spectra of compound 5

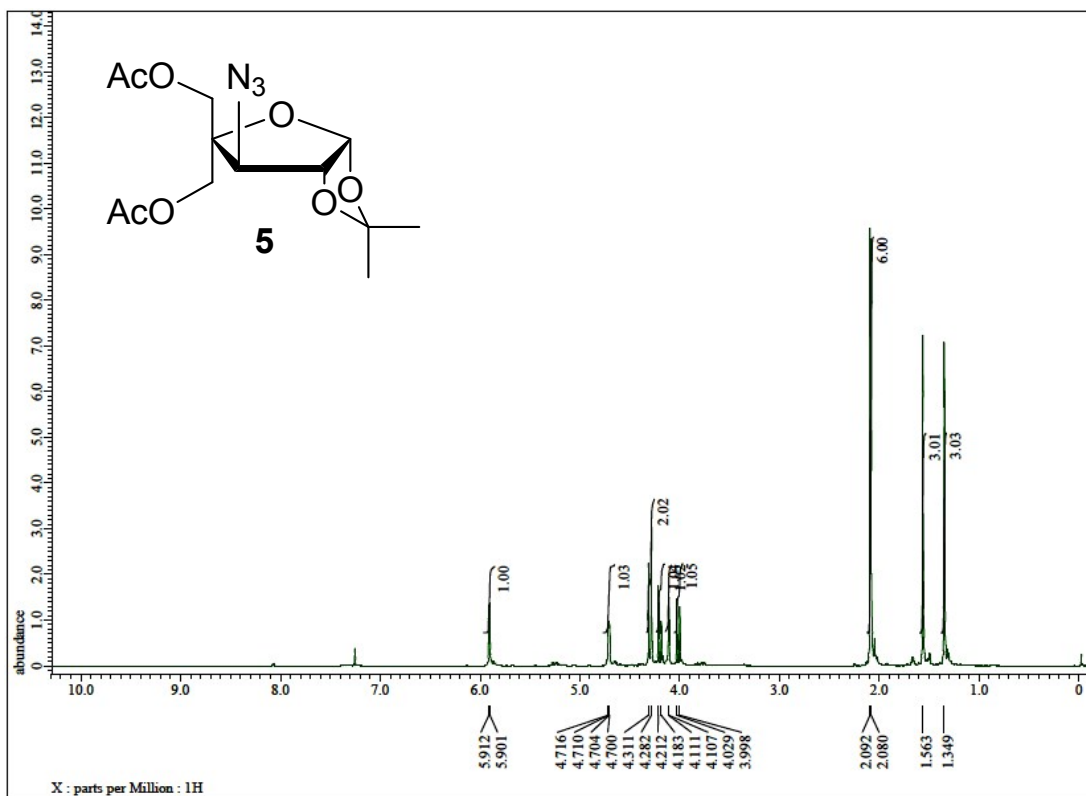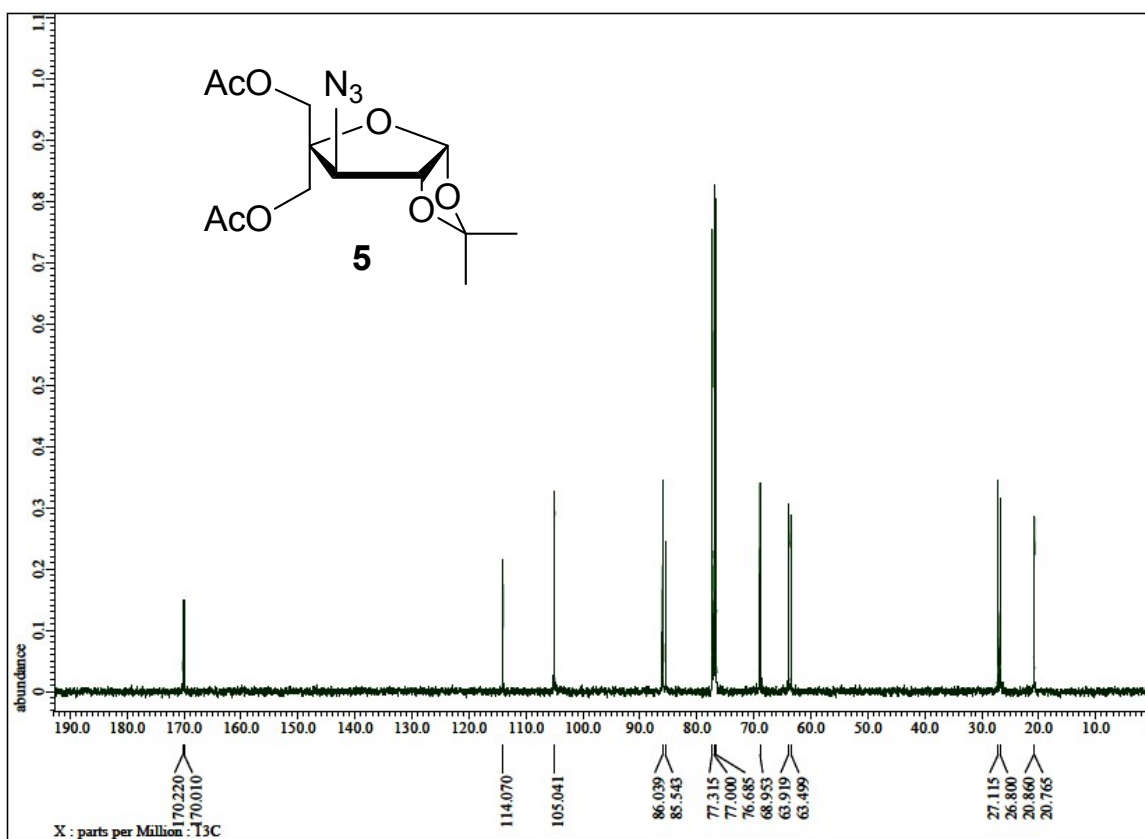

<sup>1</sup>H- and <sup>13</sup>C-NMR spectra of compound 6

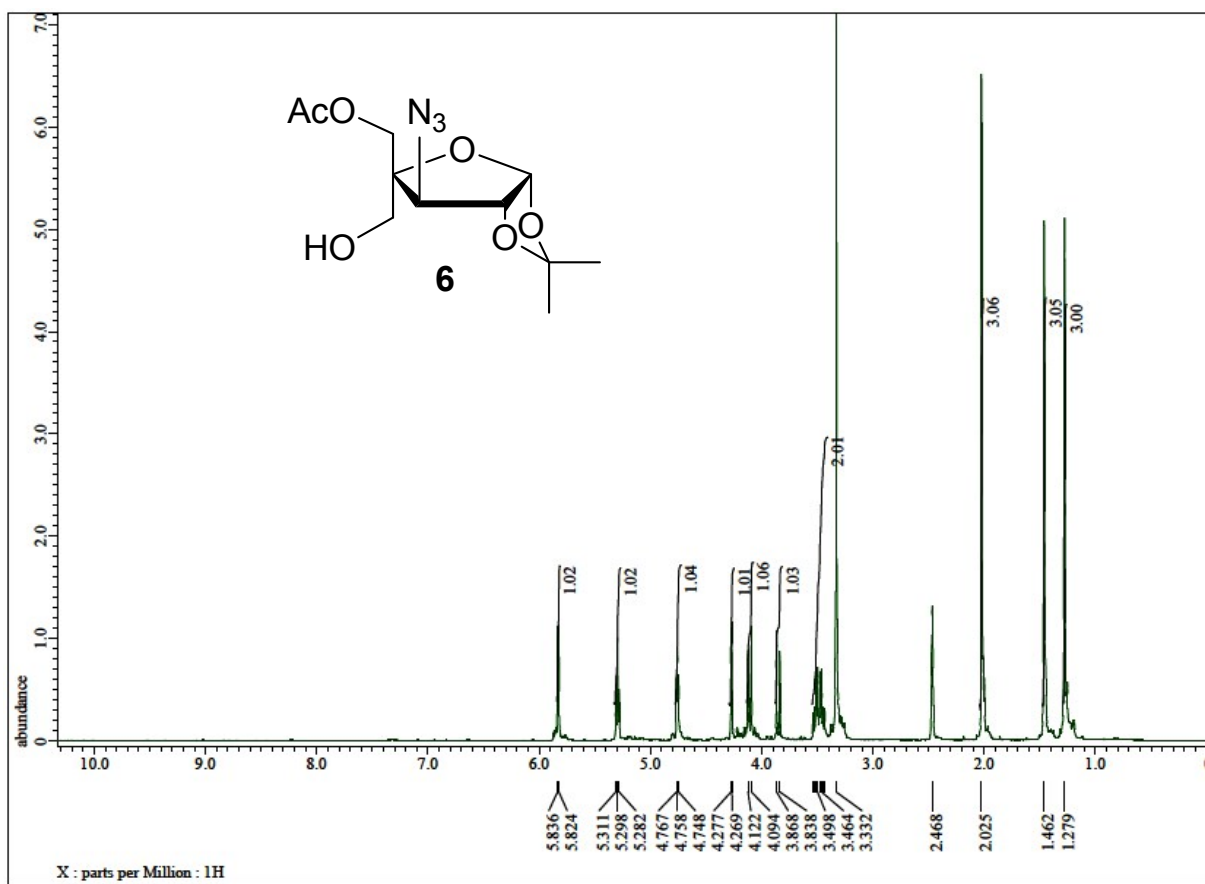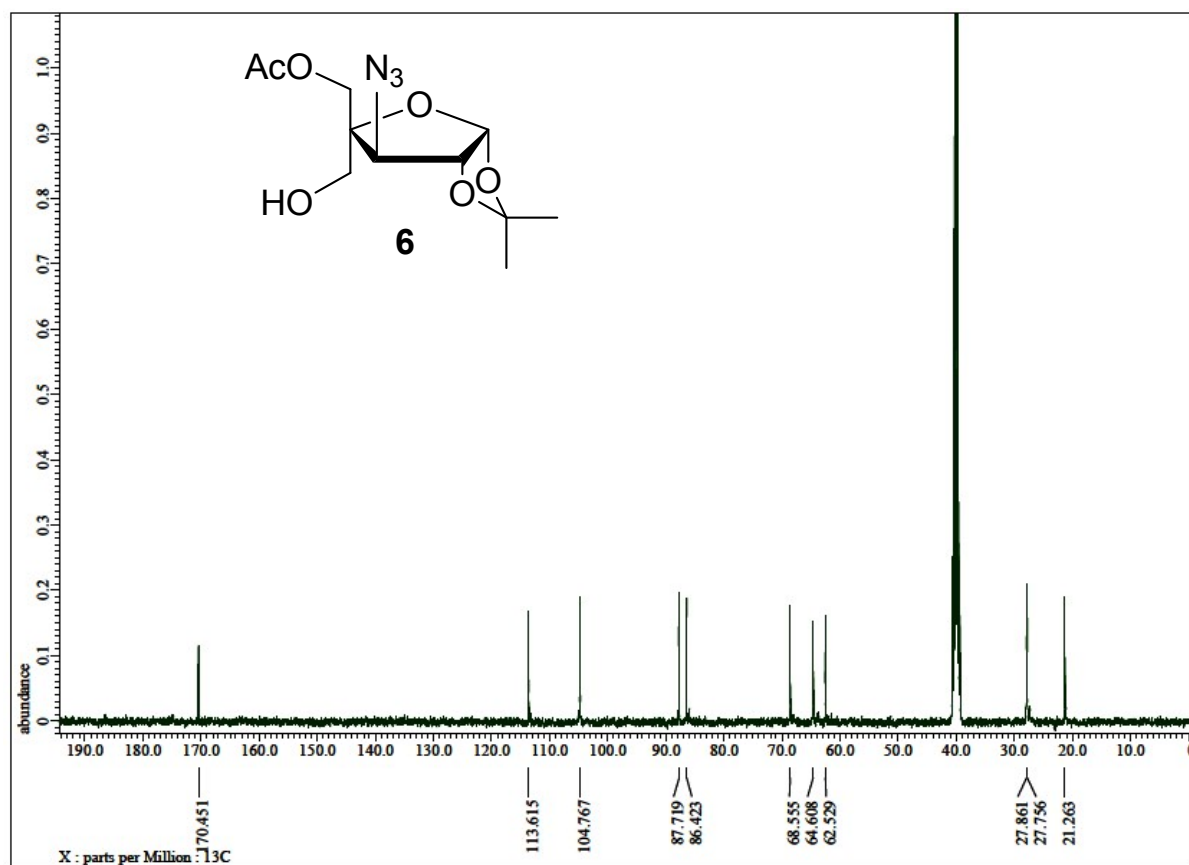

$^1\text{H}$ - $^1\text{H}$  COSY and  $^1\text{H}$ - $^1\text{H}$  NOESY NMR spectra of compound 6

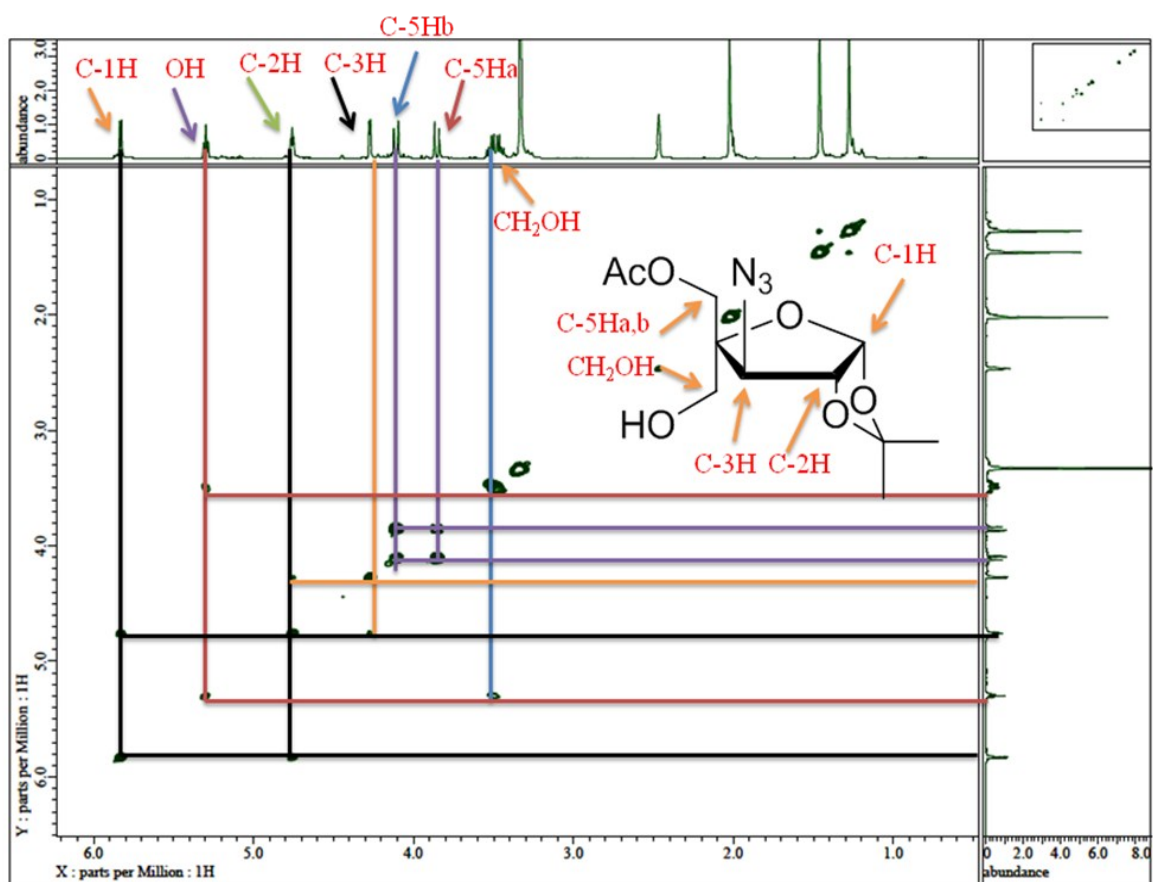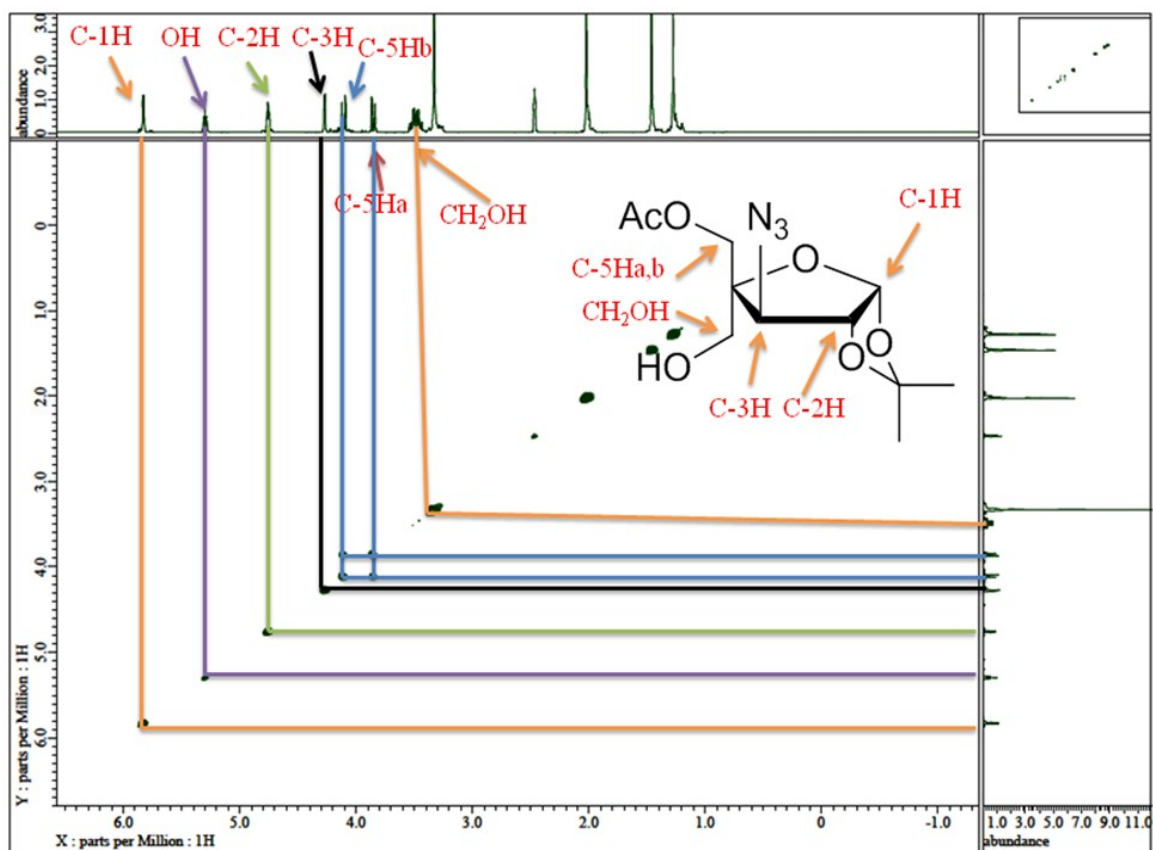

# <sup>1</sup>H- and <sup>13</sup>C-NMR spectra of compound 7

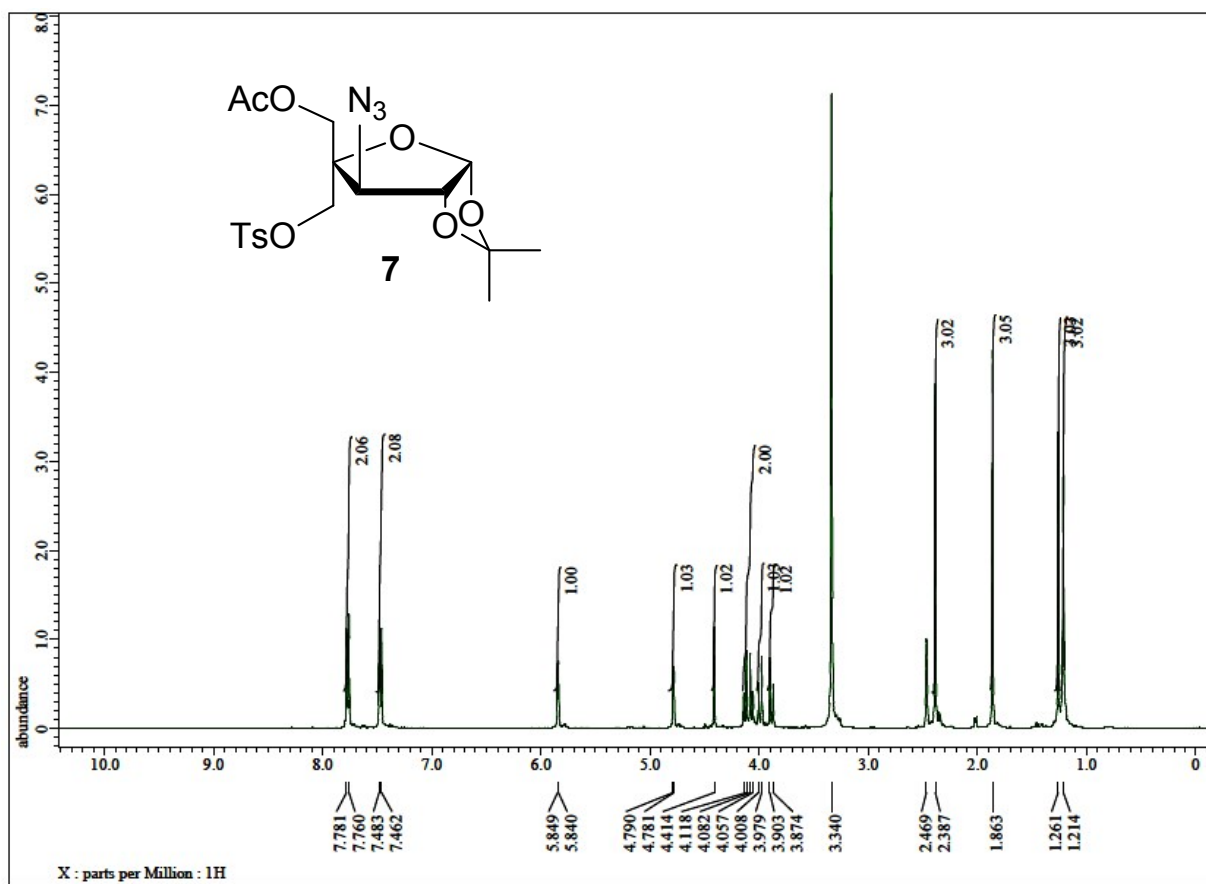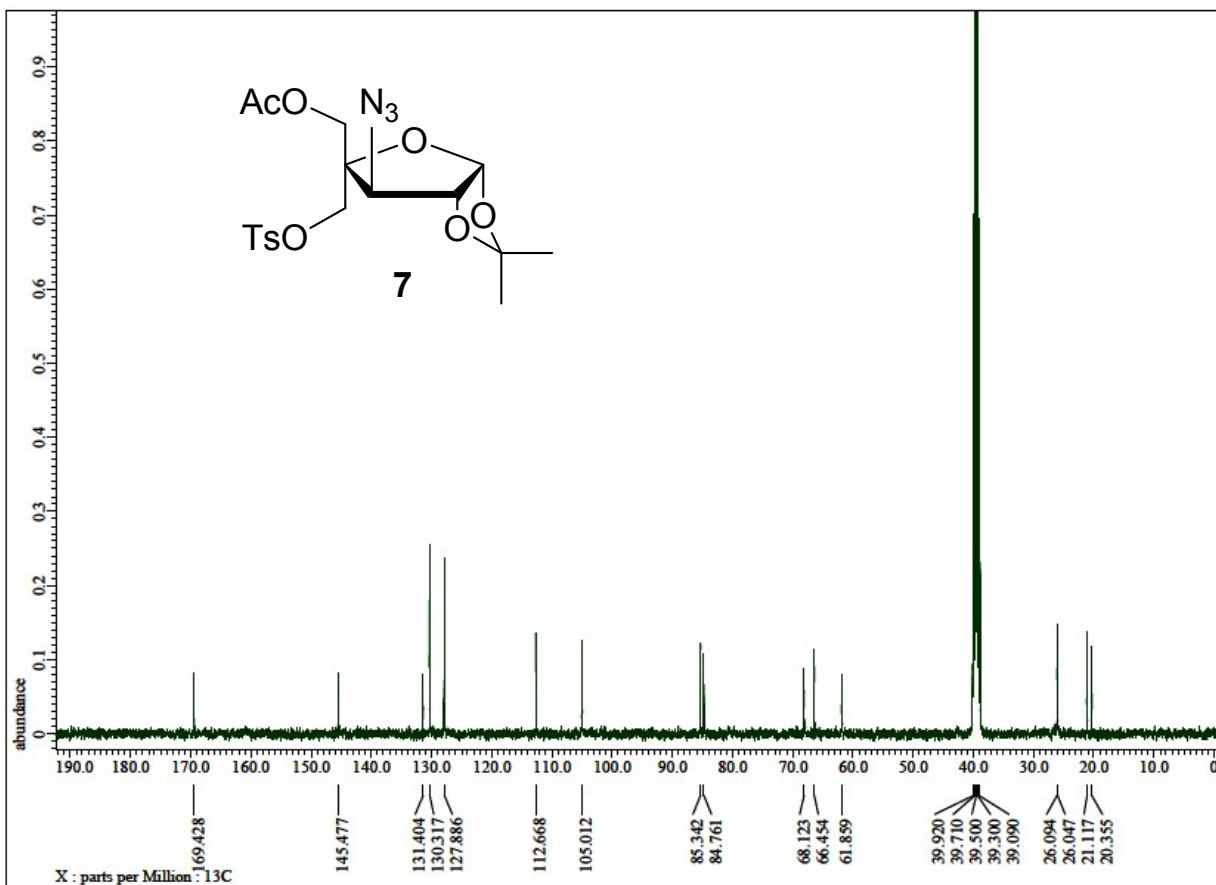

**<sup>1</sup>H- and <sup>13</sup>C-NMR spectra of compound 8a-8b**

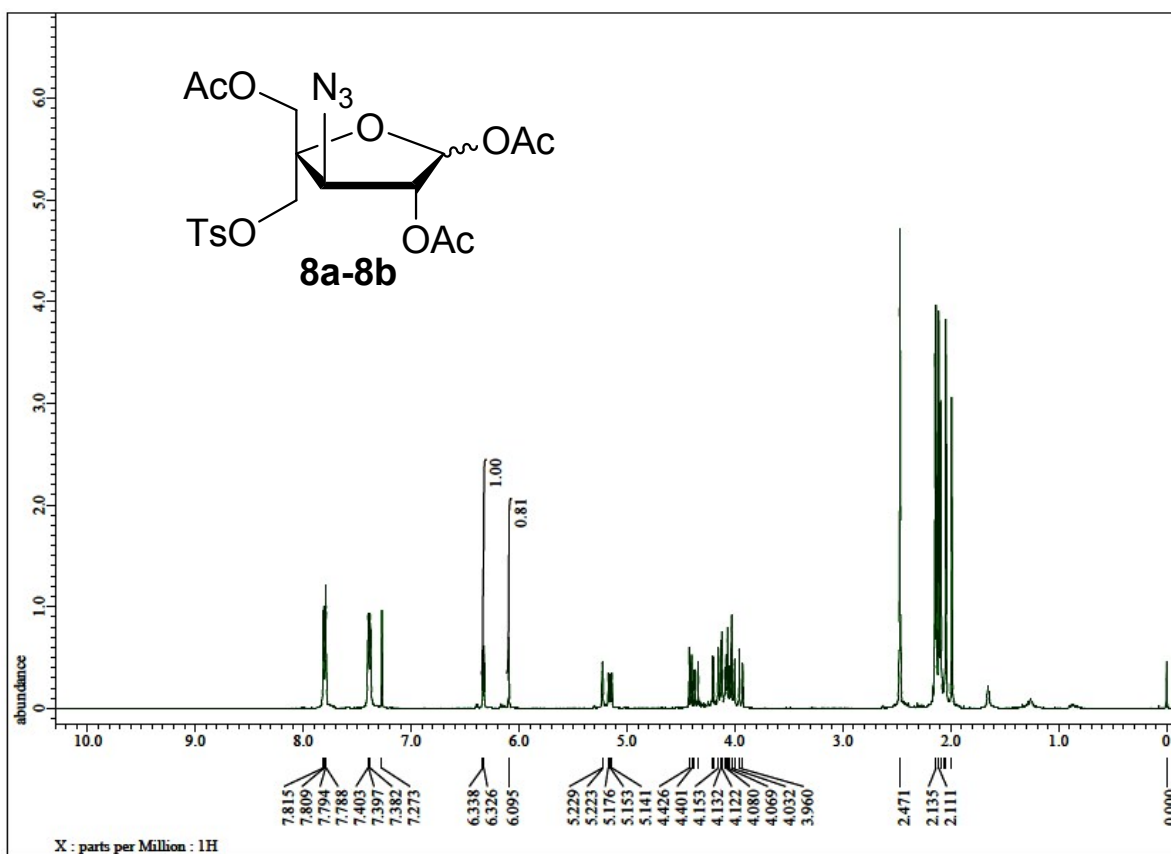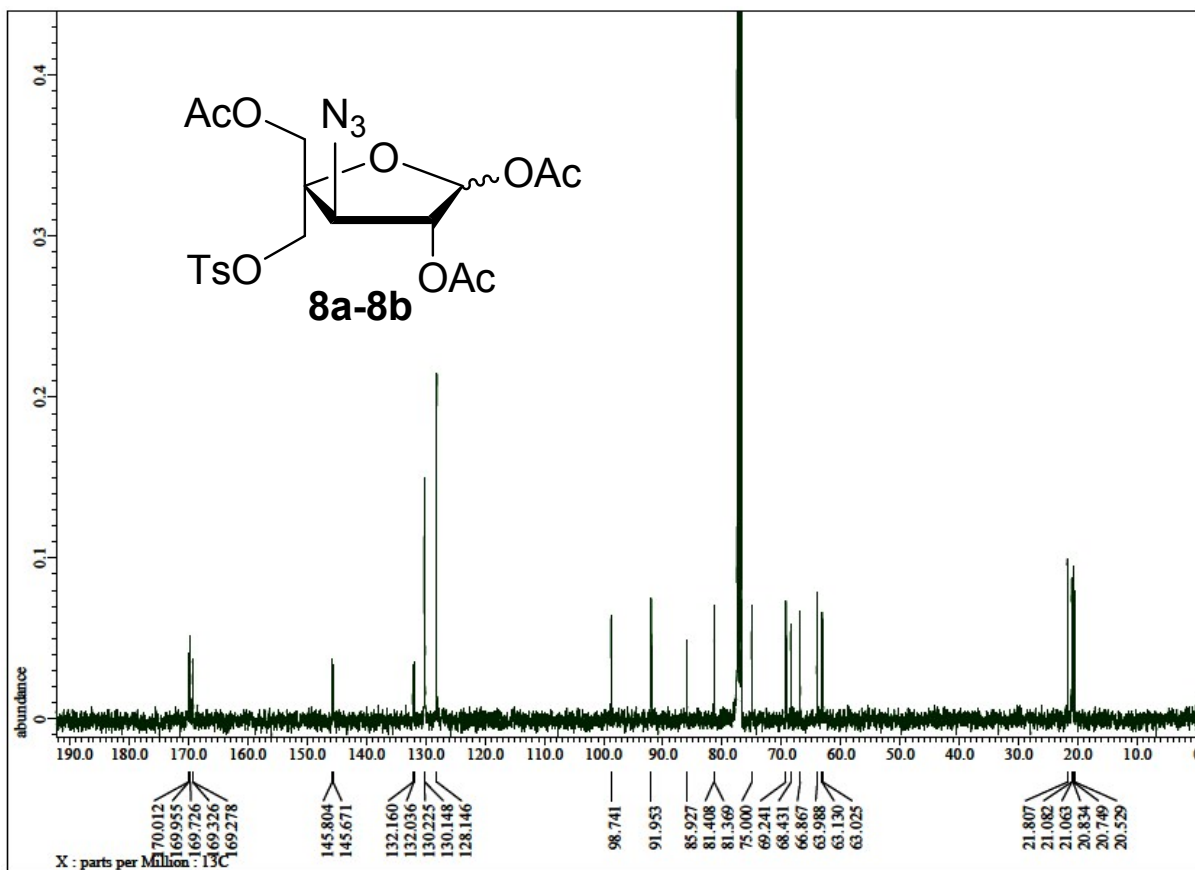

# <sup>1</sup>H- and <sup>13</sup>C-NMR spectra of compound 9a

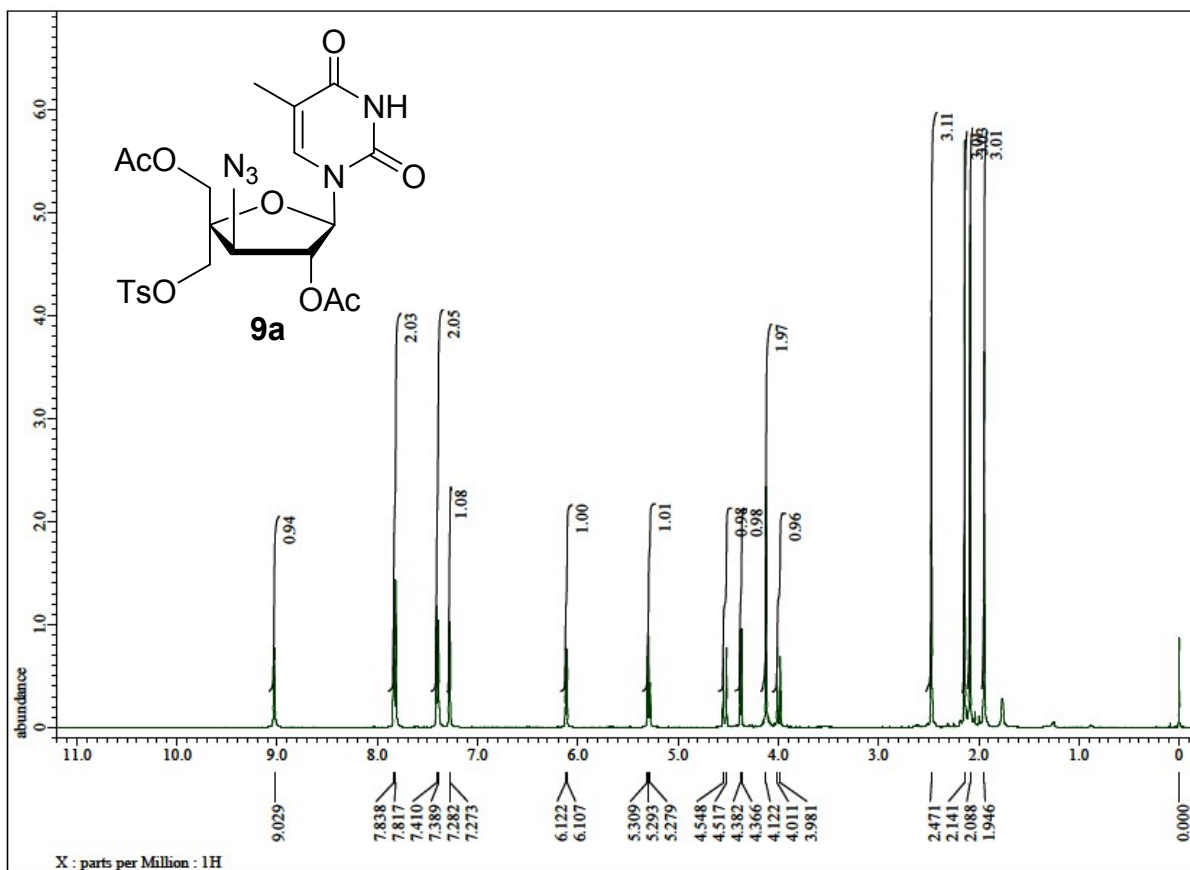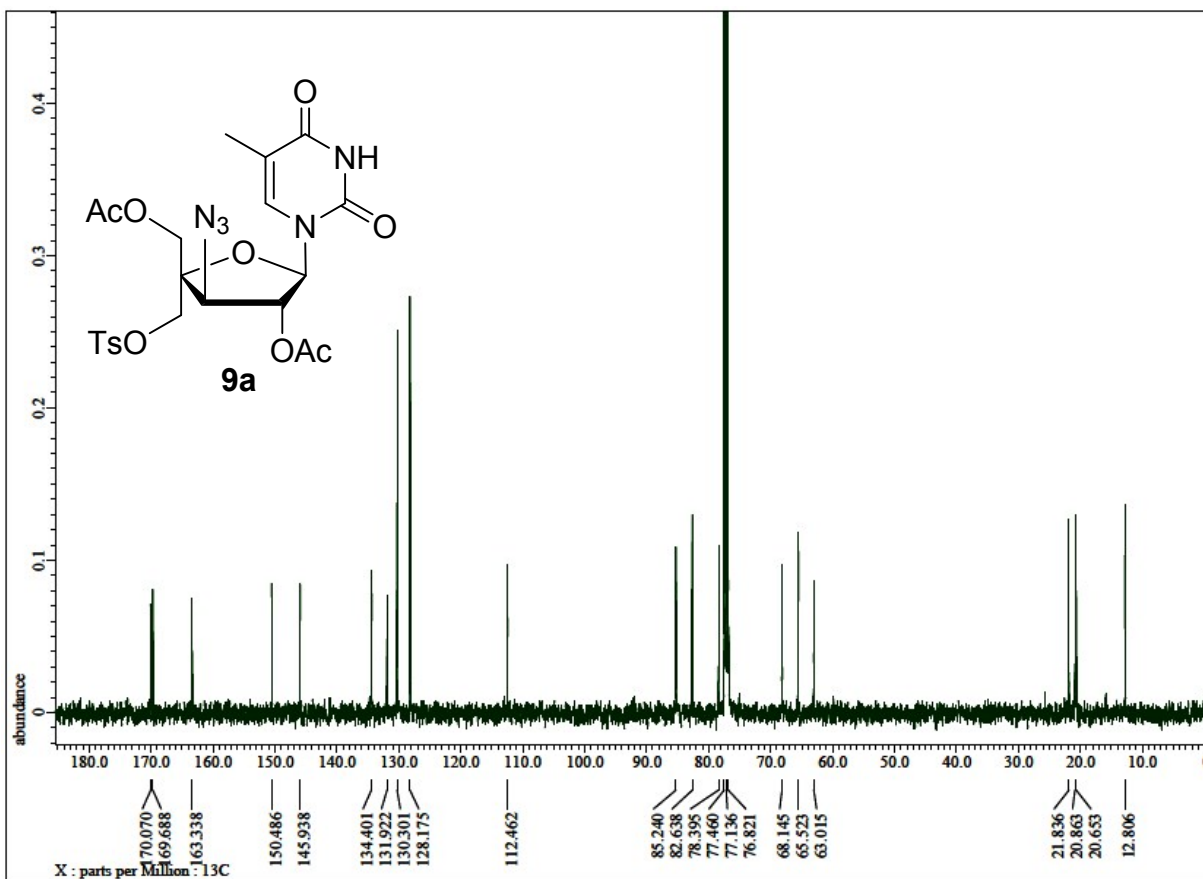



# <sup>1</sup>H- and <sup>13</sup>C-NMR spectra of compound 9b

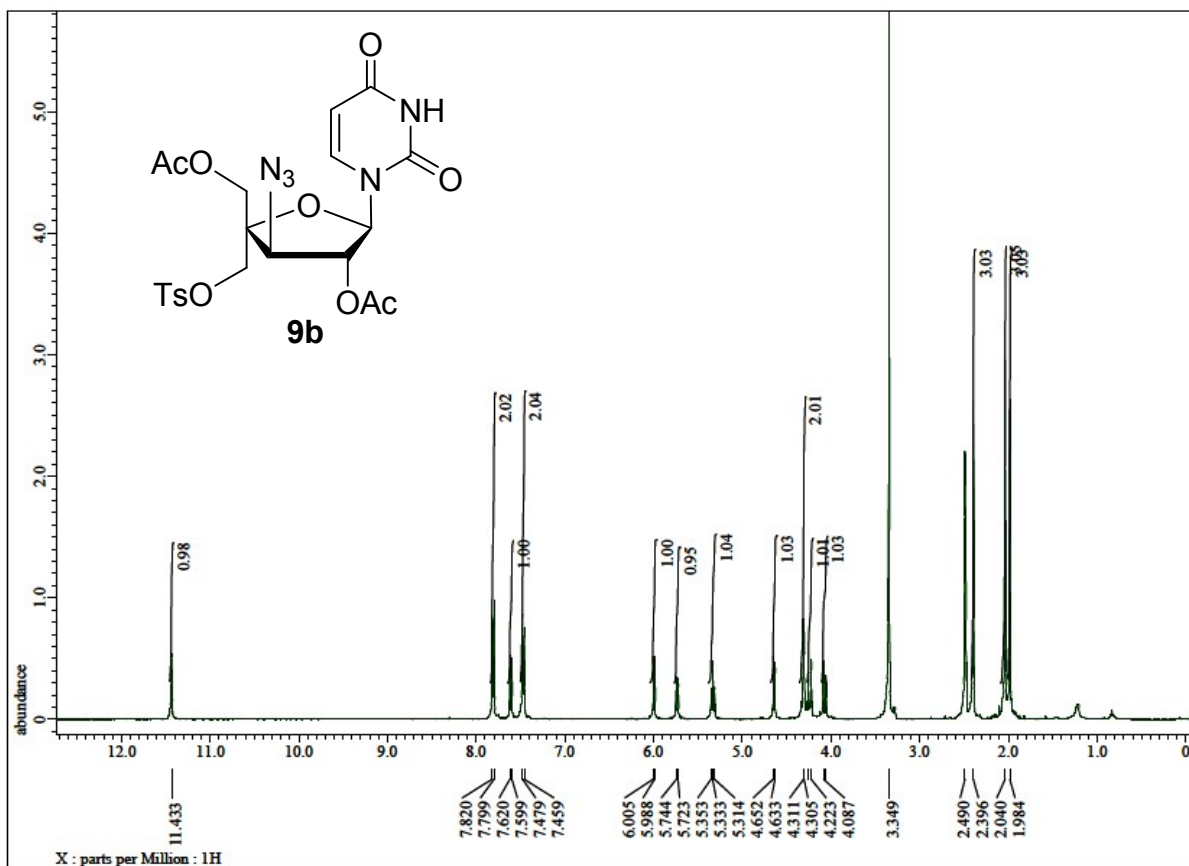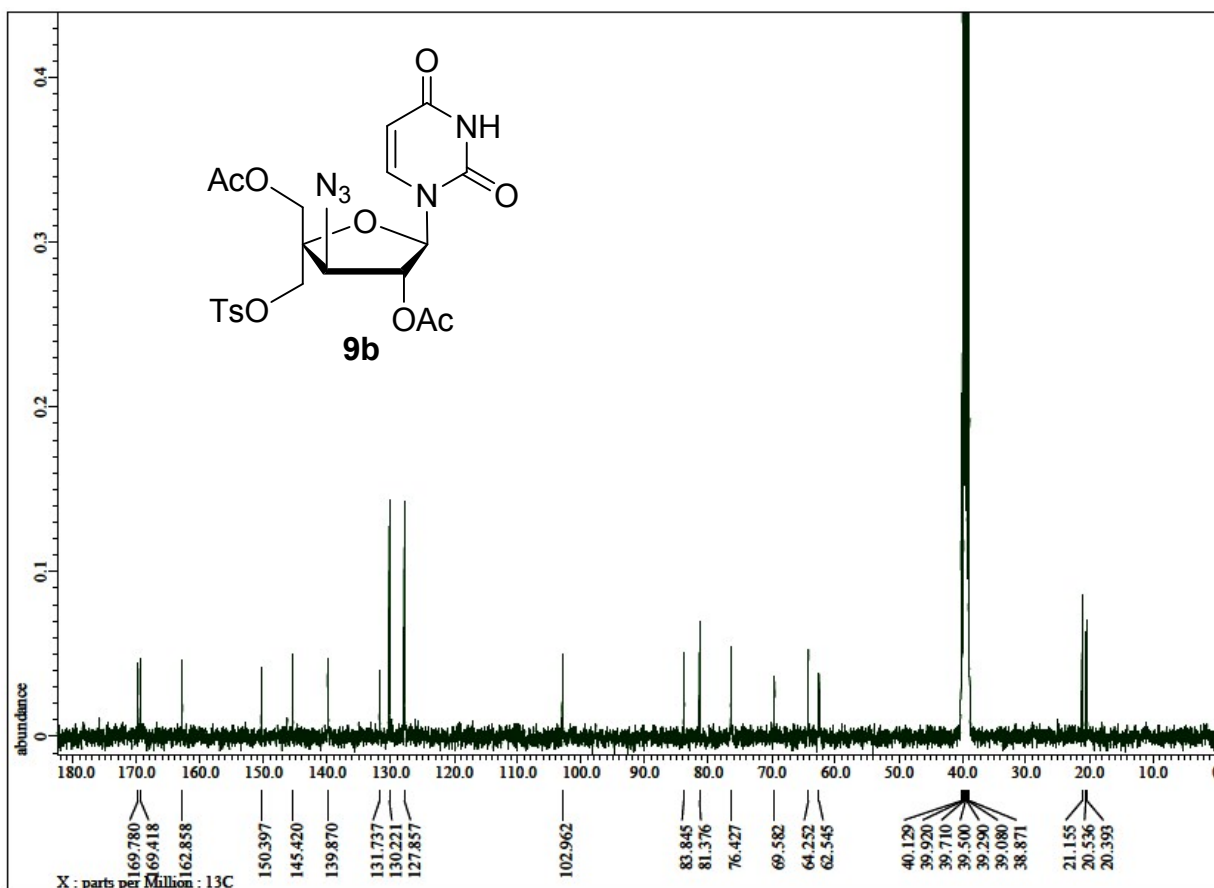

# <sup>1</sup>H- and <sup>13</sup>C-NMR spectra of compound 9c

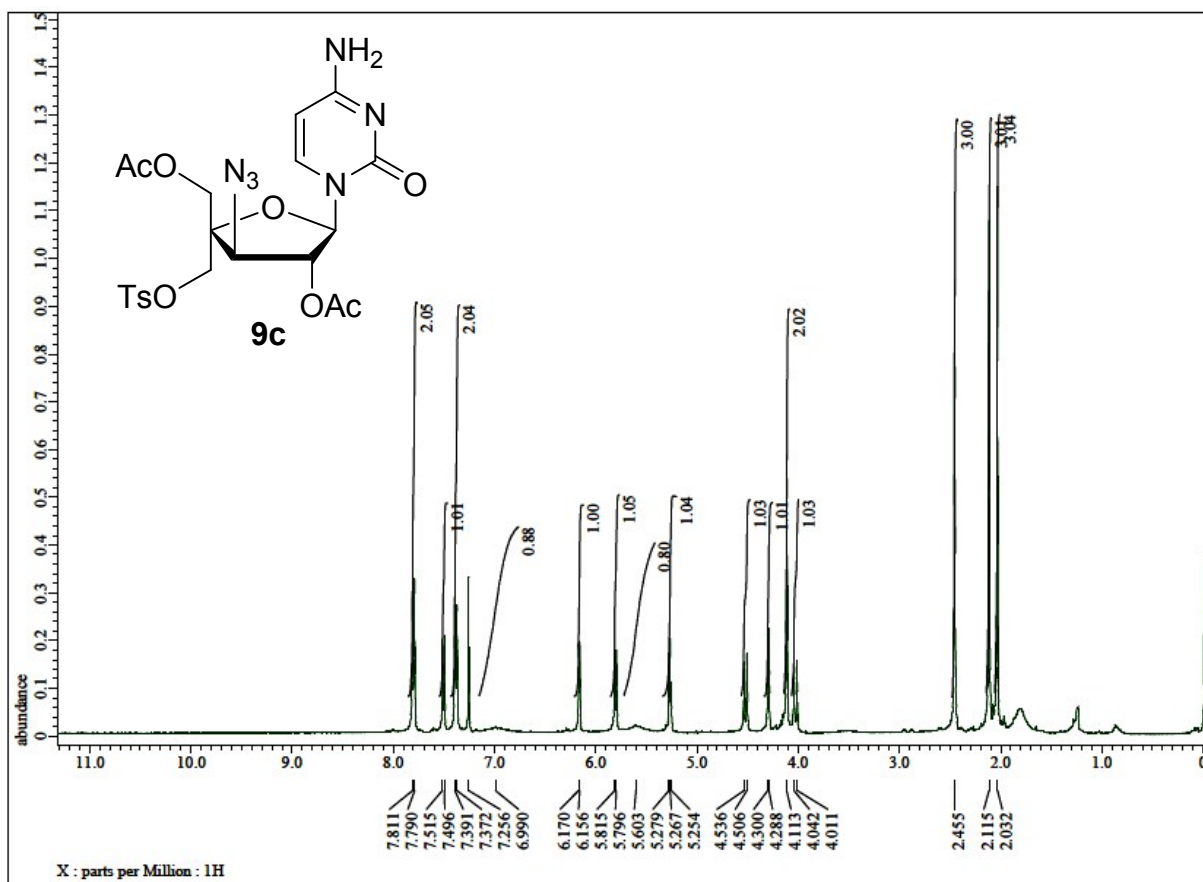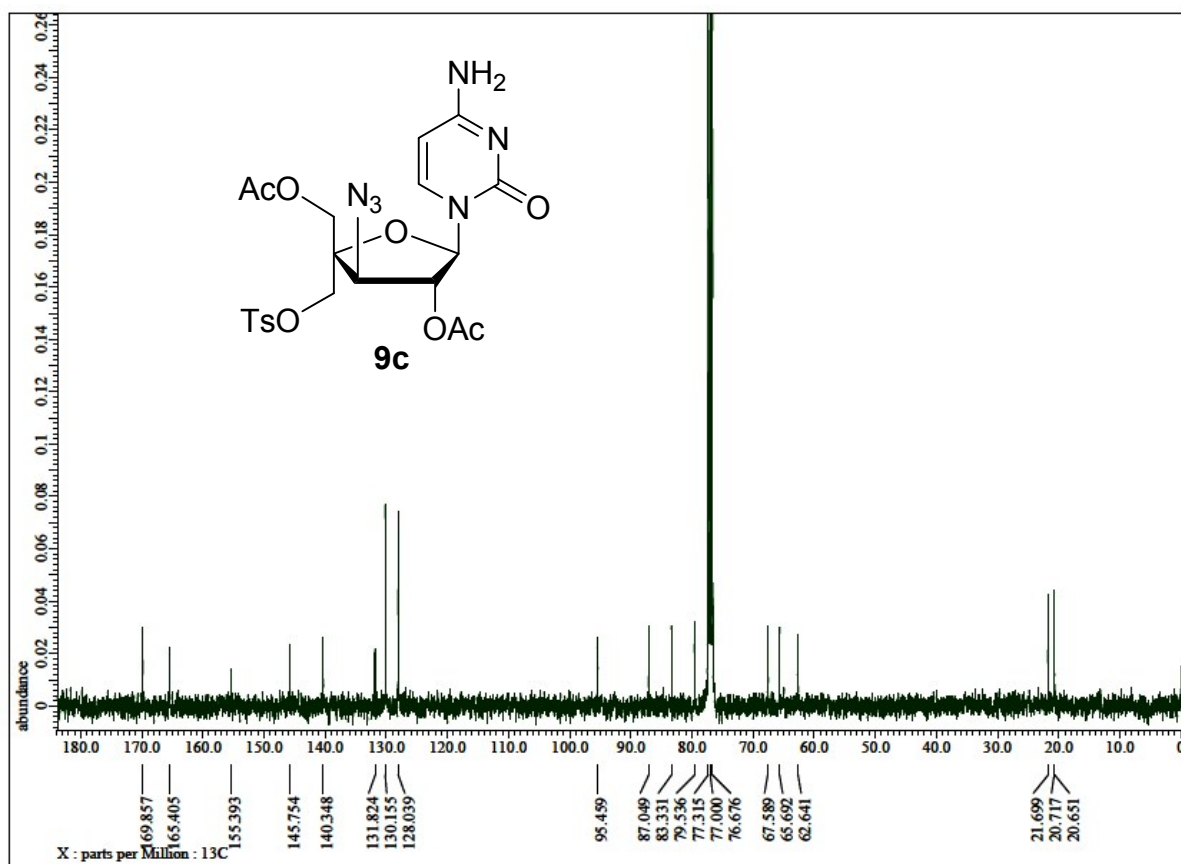

# <sup>1</sup>H- and <sup>13</sup>C- NMR spectra of compound 9d

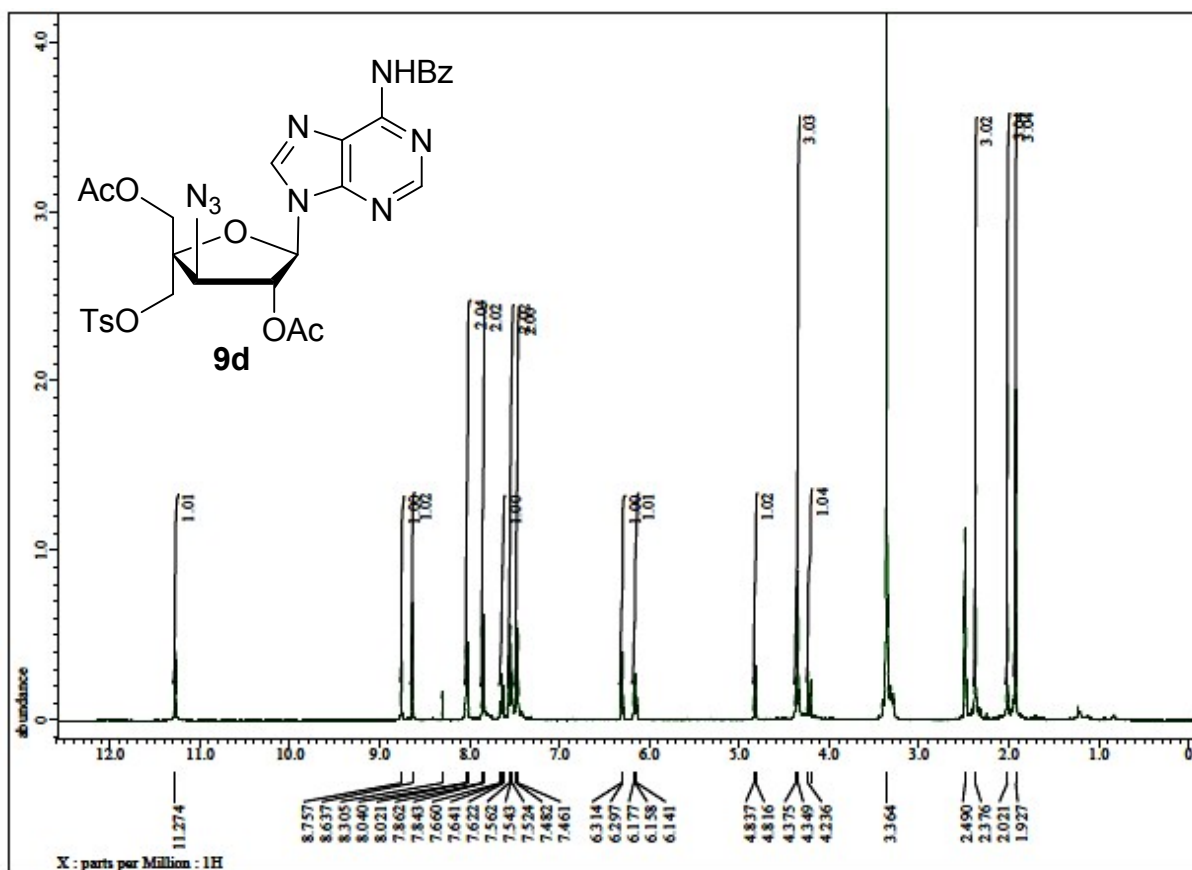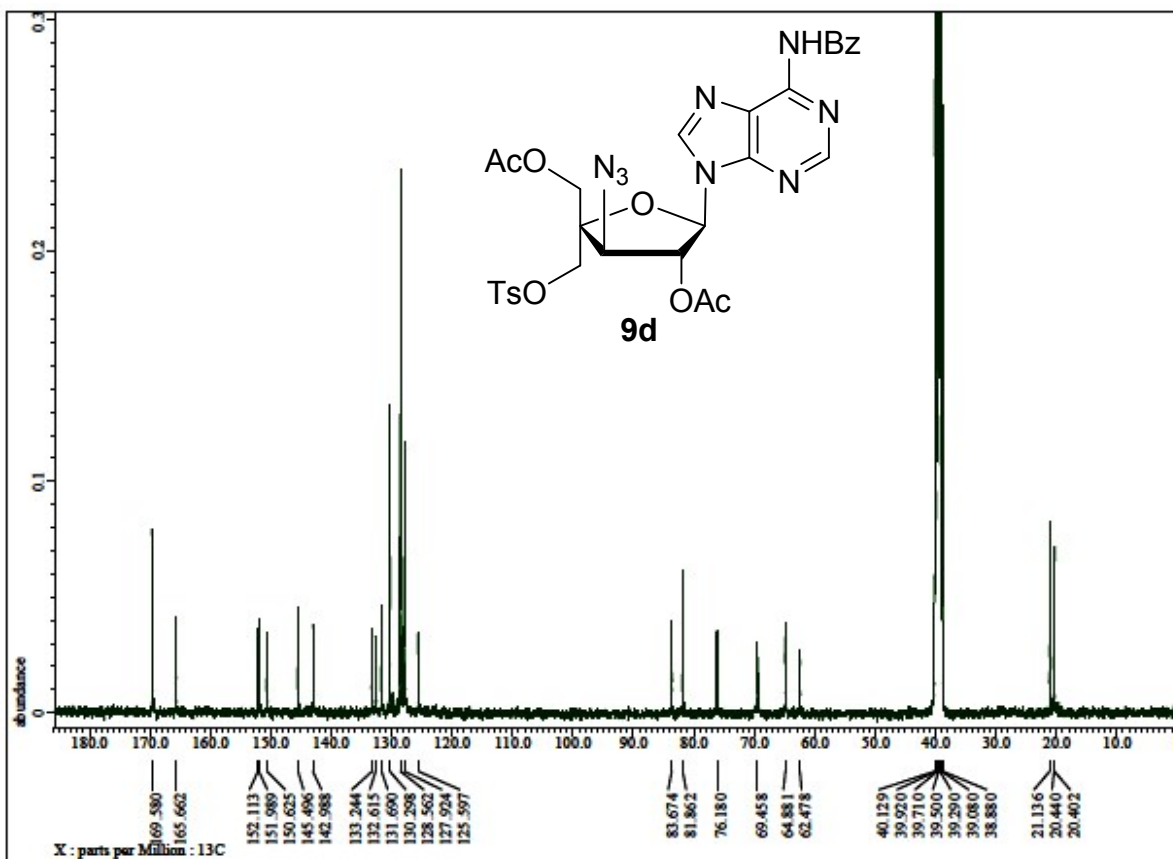

# <sup>1</sup>H- and <sup>13</sup>C-NMR spectra of compound 1a

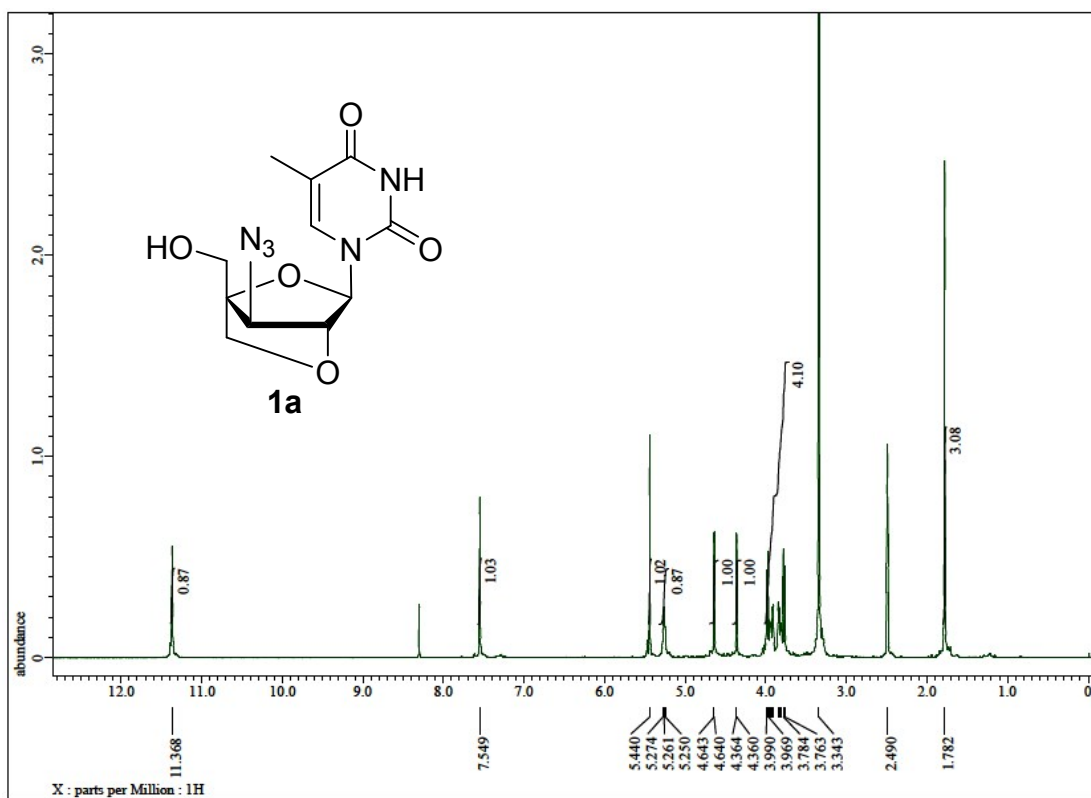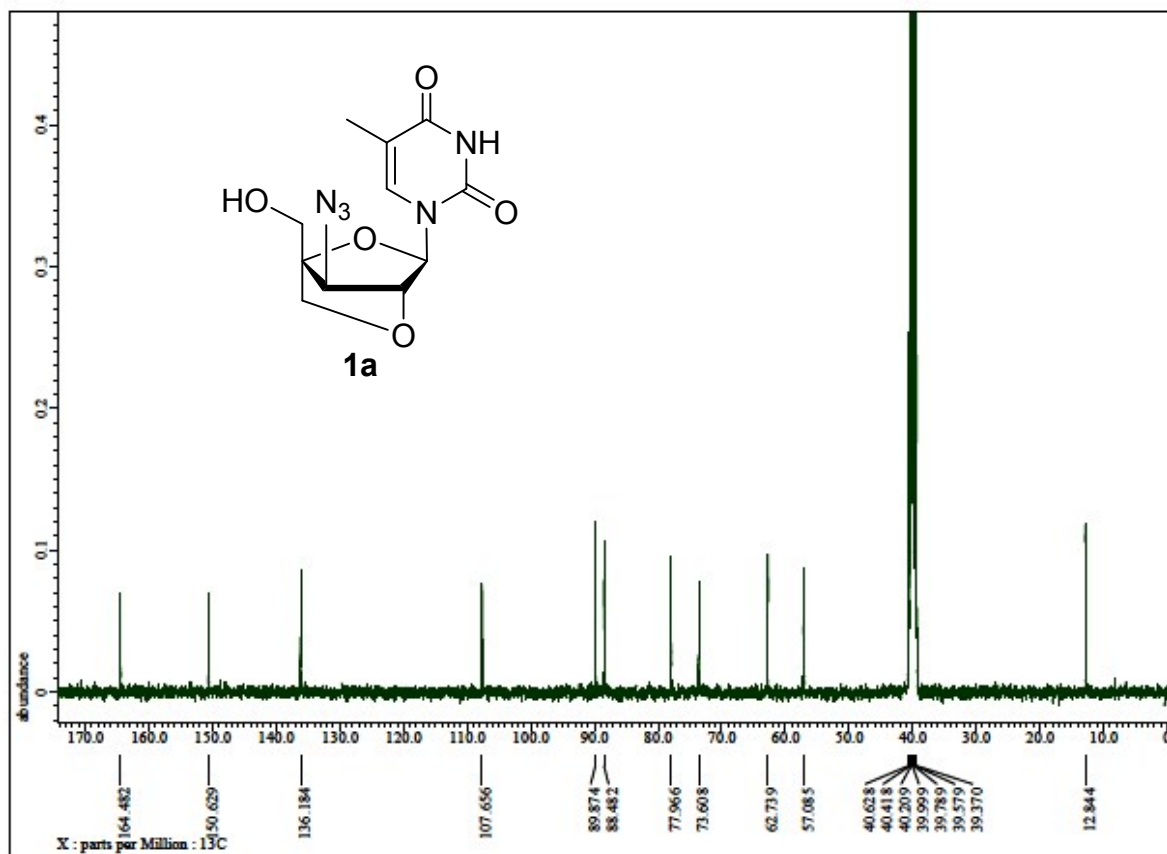

$^1\text{H}$ - $^1\text{H}$  COSY and  $^1\text{H}$ - $^{13}\text{C}$  HMQC NMR spectra of compound 1a

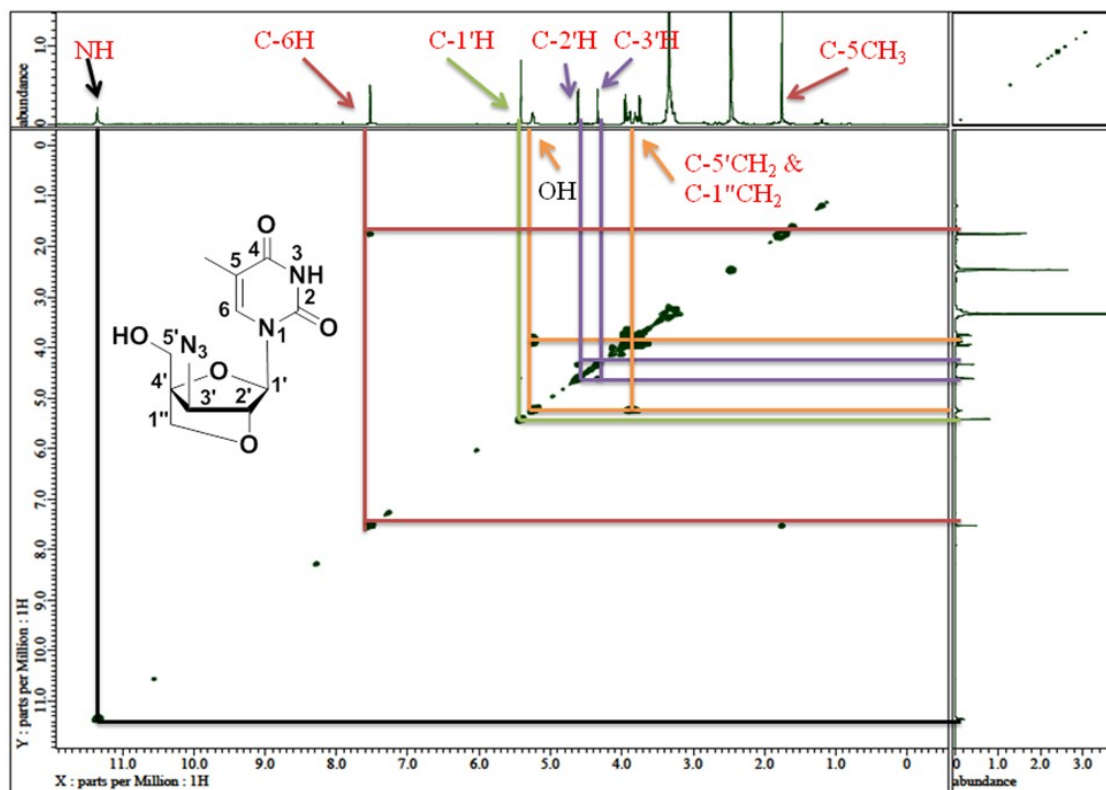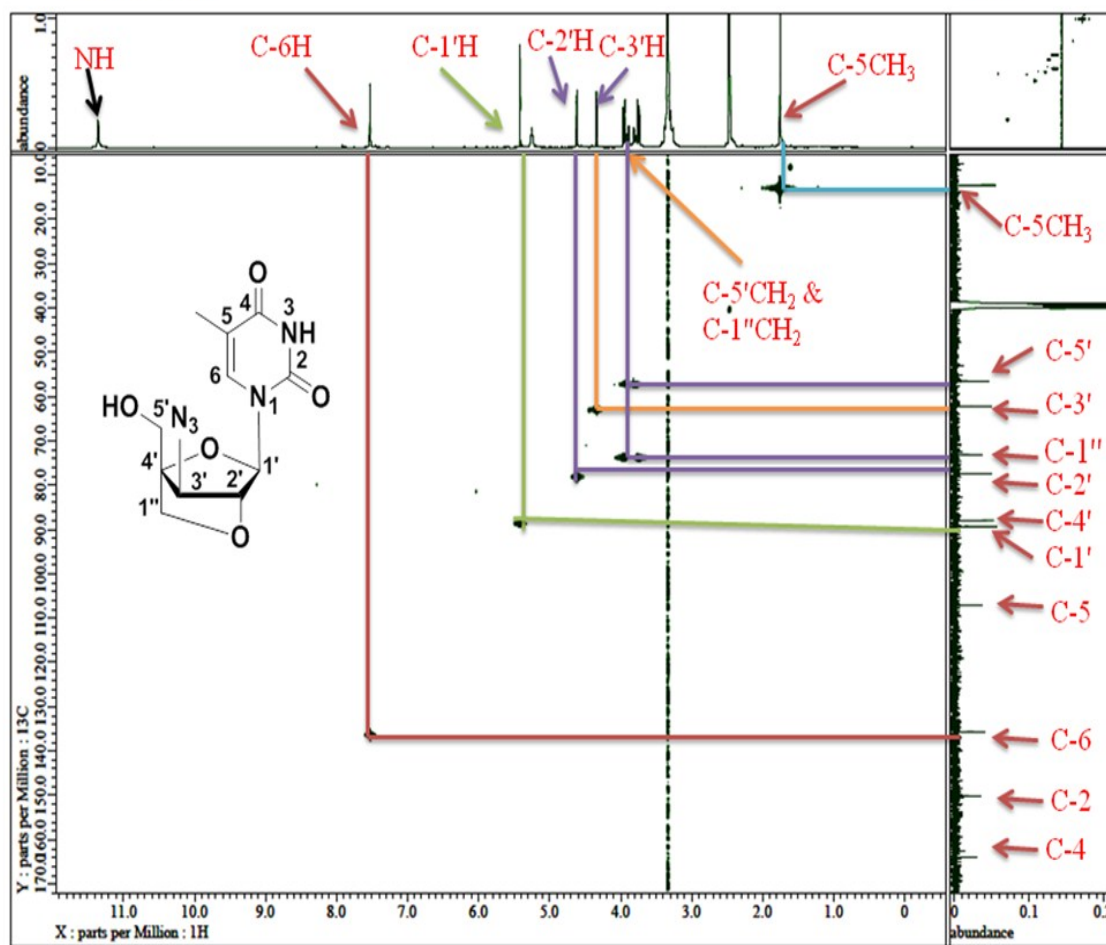

# <sup>1</sup>H- and <sup>13</sup>C-NMR spectra of compound 1b

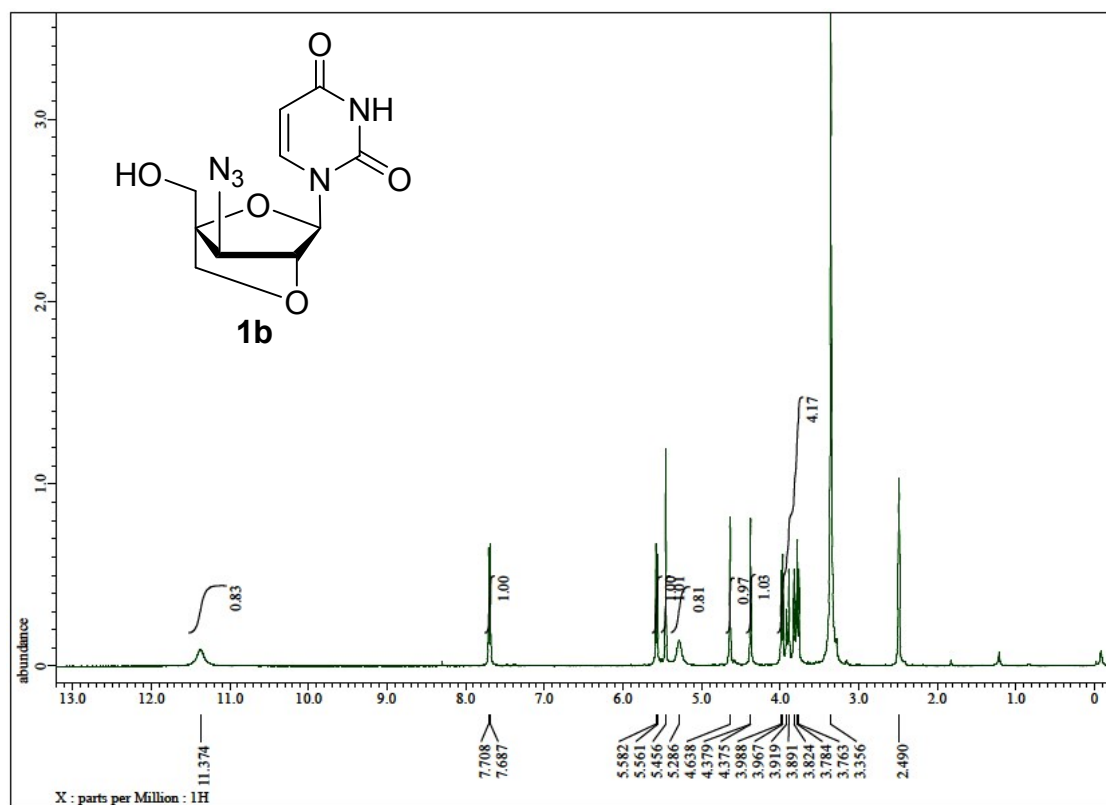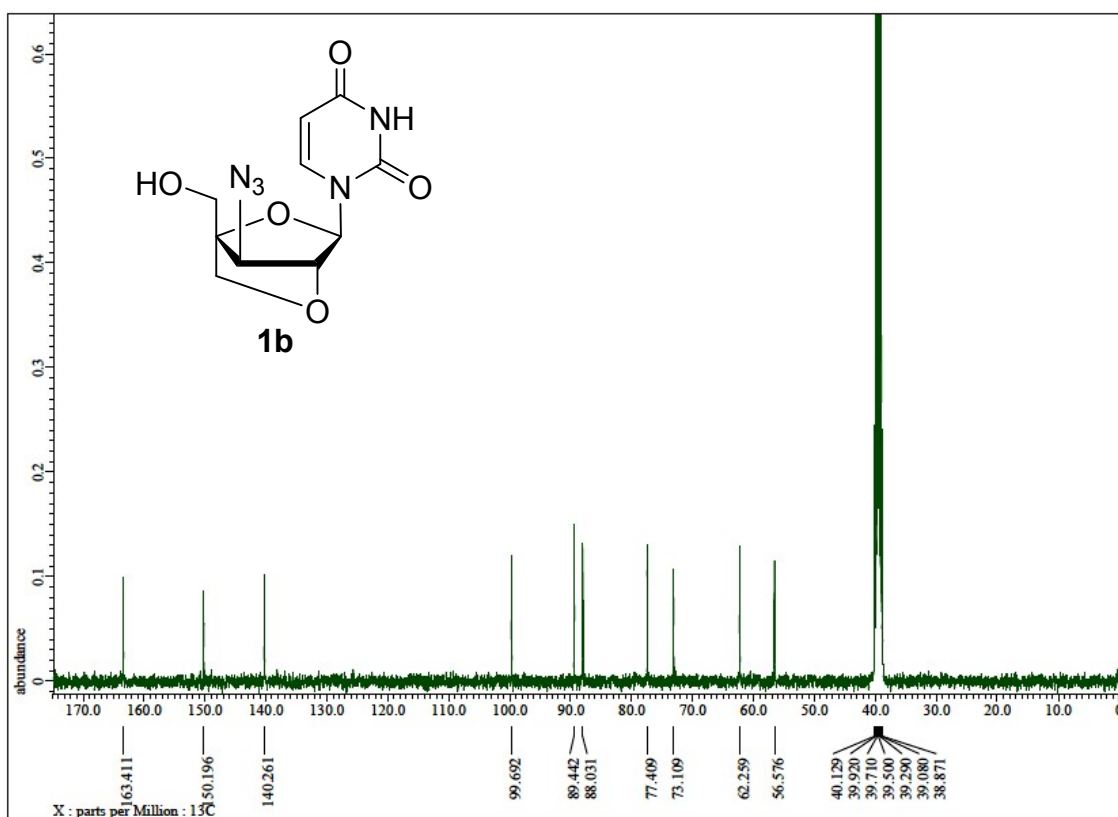

**$^1\text{H}$ - $^1\text{H}$  COSY and  $^1\text{H}$ - $^{13}\text{C}$  HSQC NMR spectra of compound 1b**

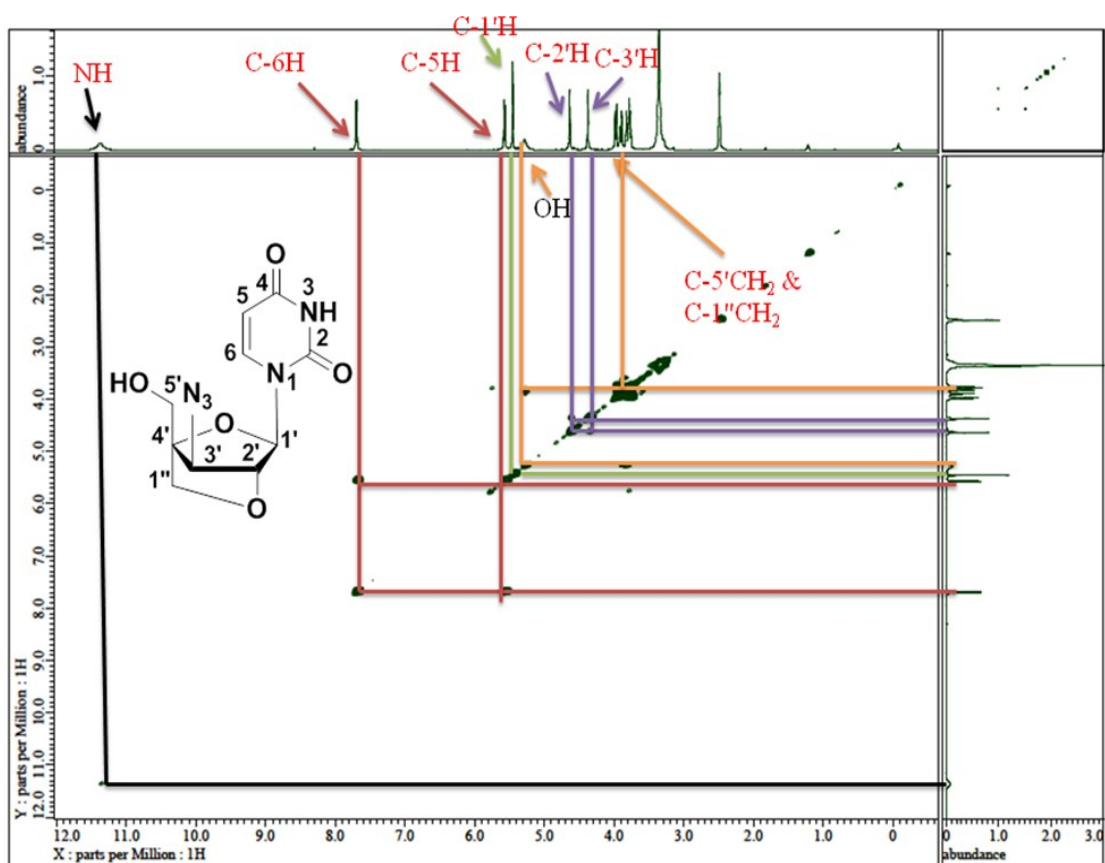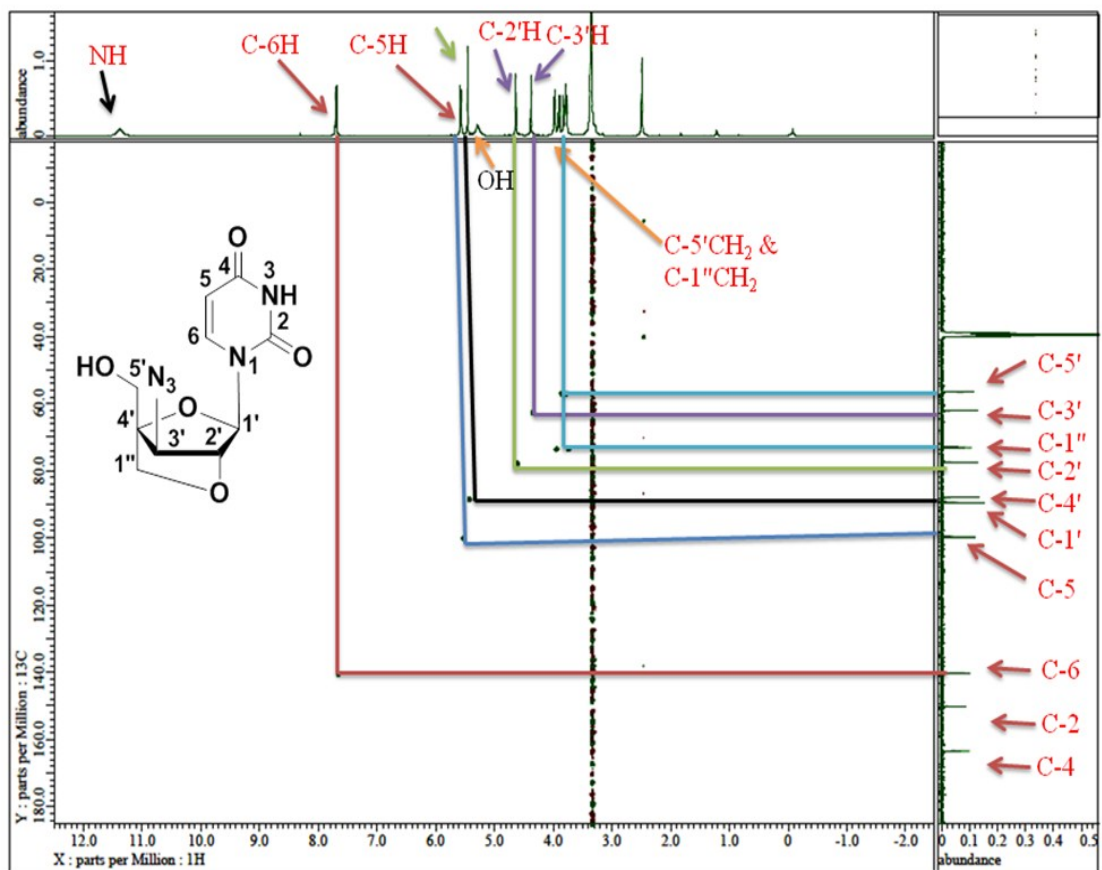

# <sup>1</sup>H- and <sup>13</sup>C-NMR spectra of compound 1c

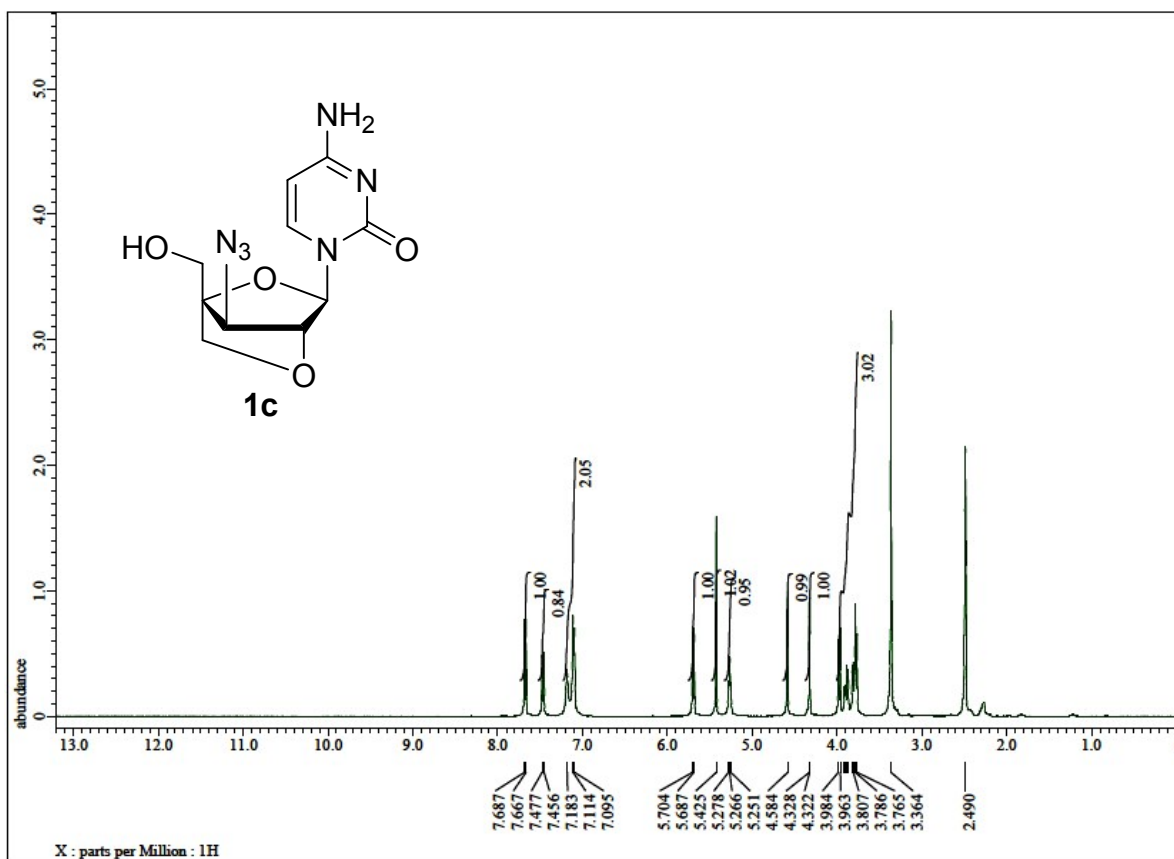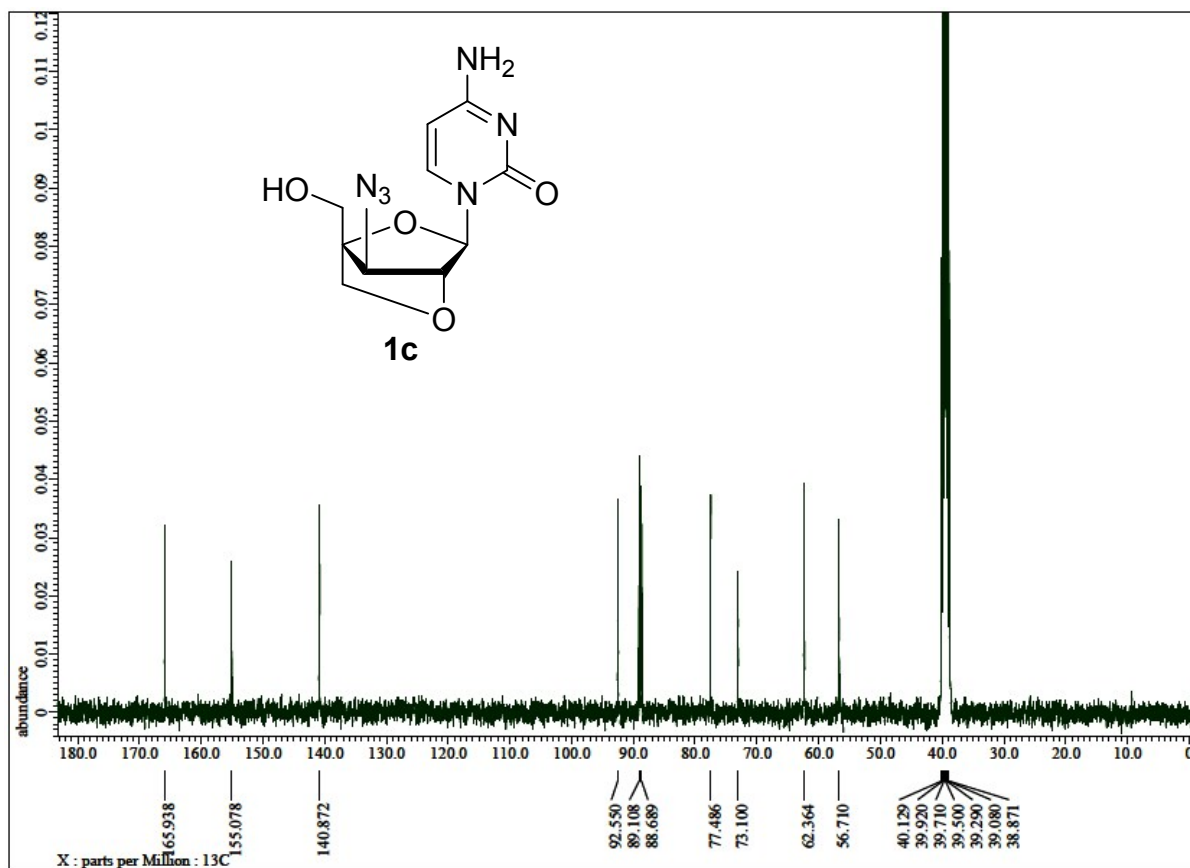



# <sup>1</sup>H- and <sup>13</sup>C-NMR spectra of compound 1d

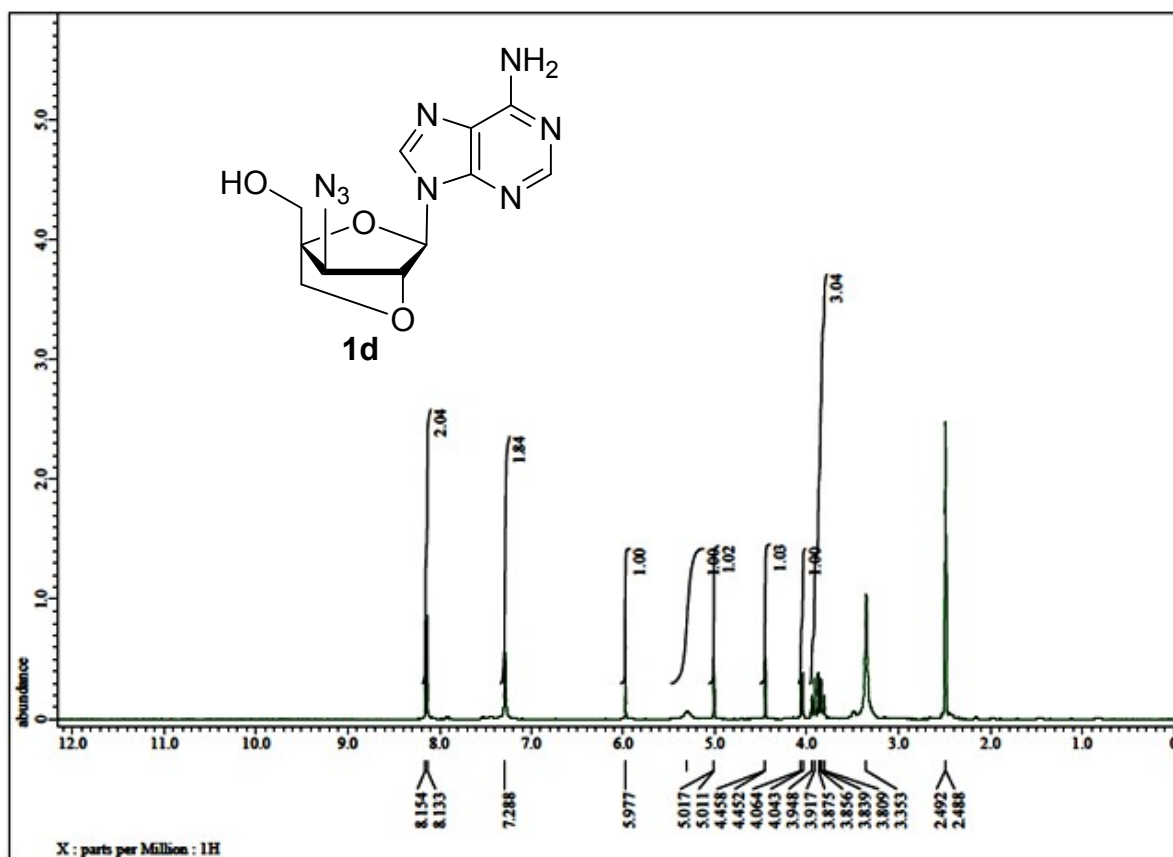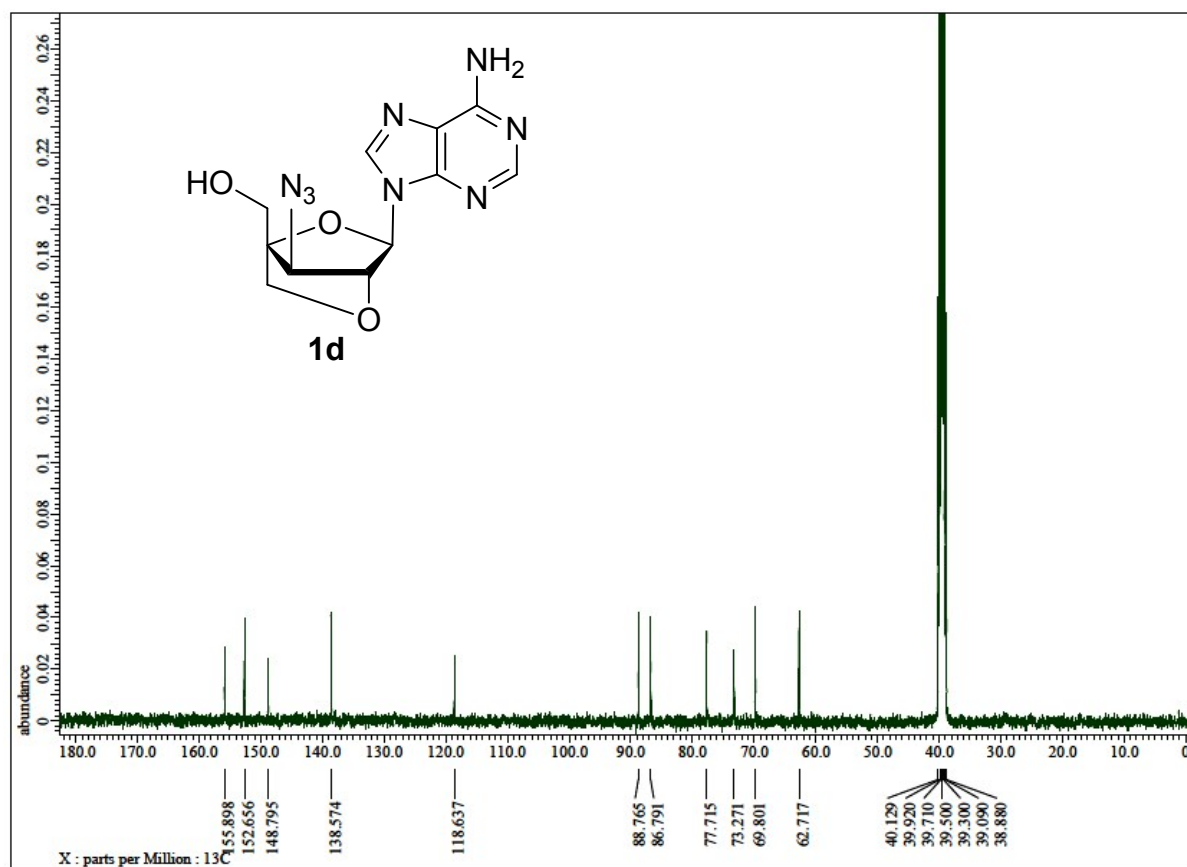

# <sup>1</sup>H- and <sup>13</sup>C-NMR spectra of compound 2

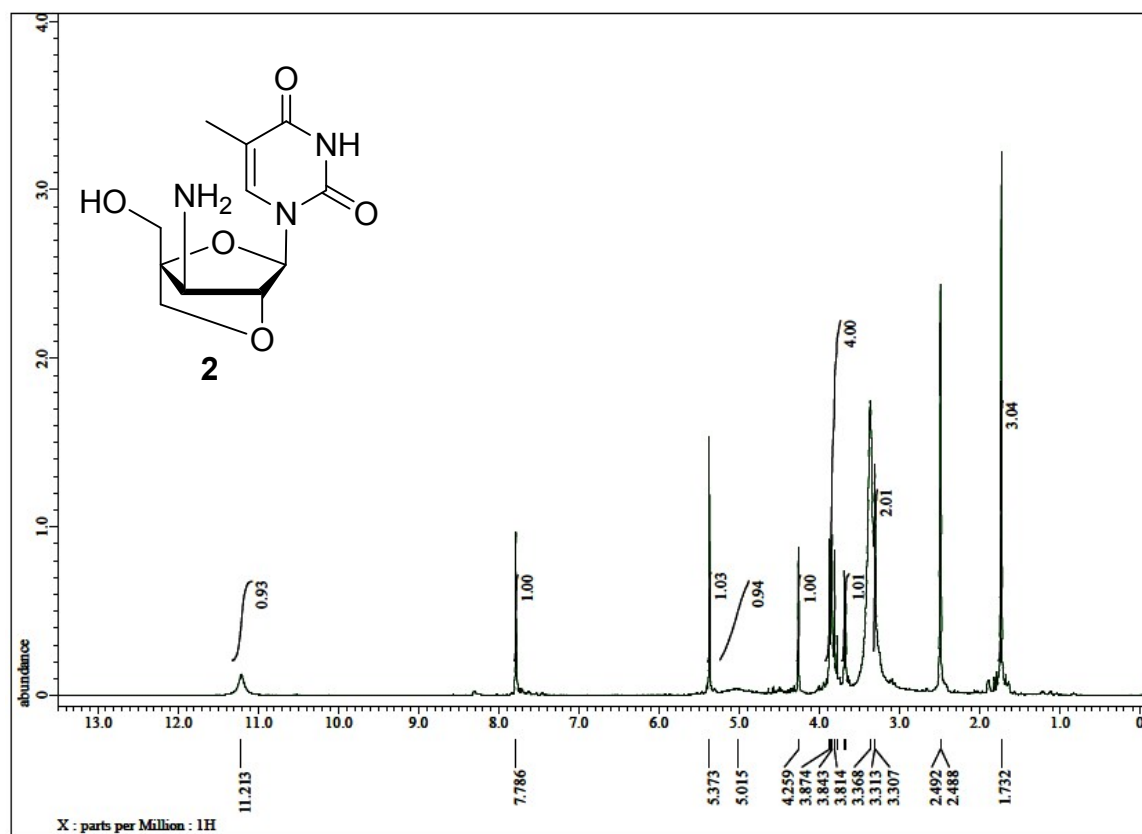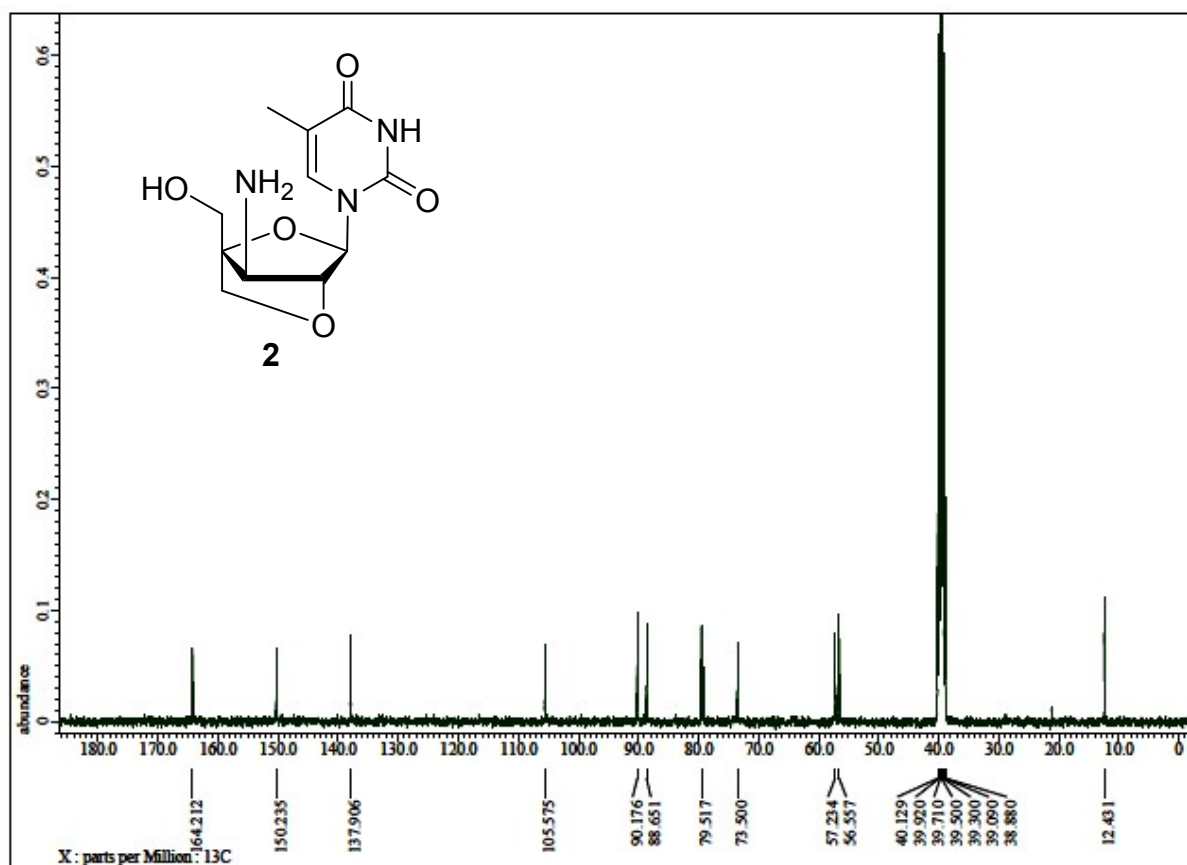

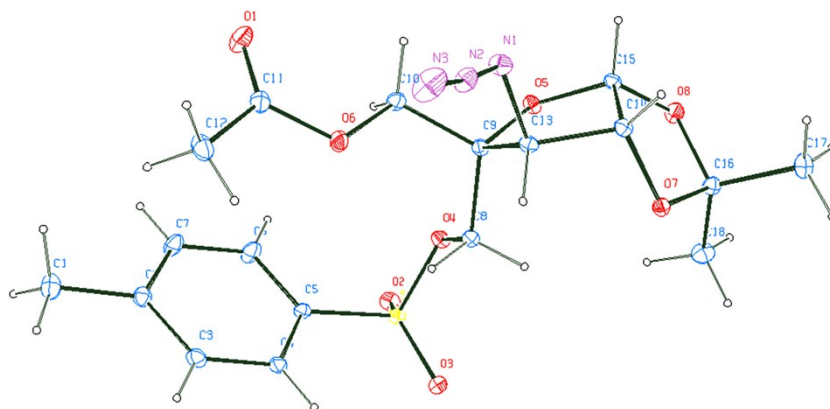

**Figure S1.** ORTEP diagram of tosylated sugar derivative **7**

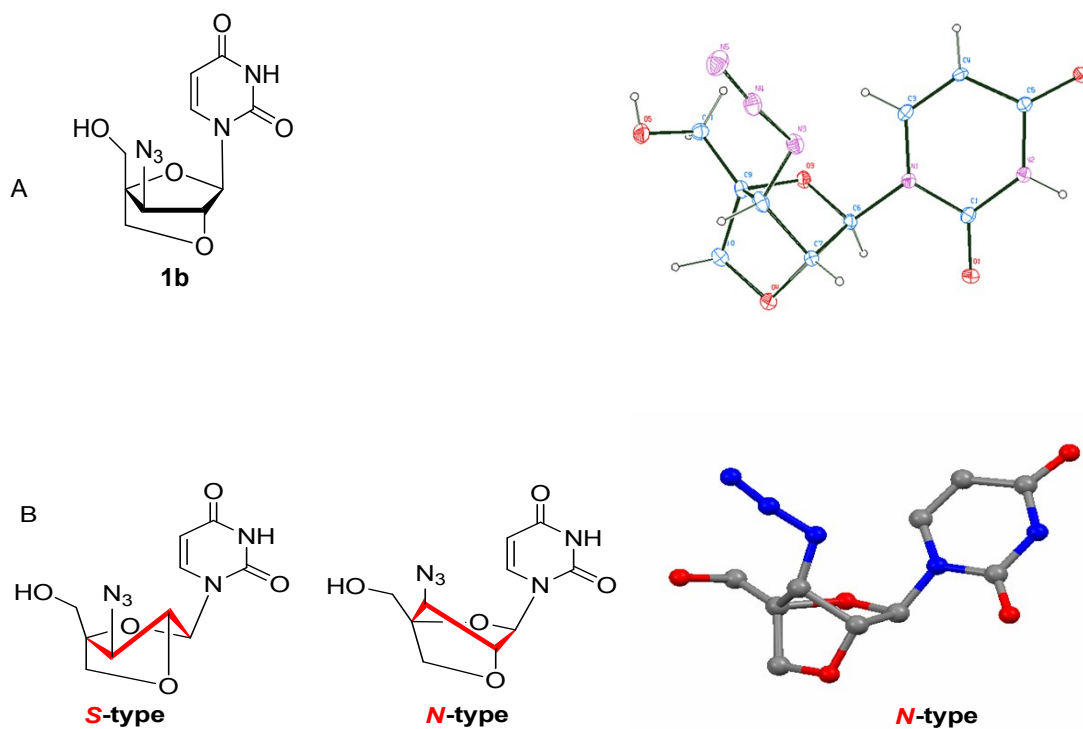

**Figure S2.** (A) ORTEP diagram of compound 3'-azido-xylobicyclouridine **1b**; (B) Preferred *N*-type sugar pucker in compound **1b**

**Table S1.** Single crystal X-ray diffraction data of tosylated sugar derivative **7** and 3'-azido-3'-deoxy-2'-O,4'-C-methylene-xylofuranose (**1b**).

|                               | <b>Compound 7</b>                                               | <b>Compound 1b</b>                                            |
|-------------------------------|-----------------------------------------------------------------|---------------------------------------------------------------|
| <b>Empirical formula</b>      | C <sub>18</sub> H <sub>23</sub> N <sub>3</sub> O <sub>8</sub> S | C <sub>10</sub> H <sub>11</sub> N <sub>5</sub> O <sub>5</sub> |
| <b>Formula weight</b>         | 441.45                                                          | 281.24                                                        |
| <b>Temperature</b>            | 293(2) K                                                        | 293(2) K                                                      |
| <b>Crystal system</b>         | Monoclinic                                                      | Monoclinic                                                    |
| <b>Space group</b>            | P 21                                                            | P 21                                                          |
| <b>Unit cell dimensions</b>   | a = 9.9041 (10) Å<br>α = 90°                                    | a = 6.5121(16)Å<br>α = 90°                                    |
|                               | b = 10.0867(9) Å<br>β = 94.617(8)°                              | b = 6.8206(14) Å<br>β = 93.72(3)°                             |
|                               | c = 10.6948(9) Å<br>γ = 90°                                     | c = 13.045(4) Å<br>γ = 90°                                    |
| <b>Volume</b>                 | 1064.94(17) Å <sup>3</sup>                                      | 578.2(3) Å <sup>3</sup>                                       |
| <b>Z</b>                      | 2                                                               | 2                                                             |
| <b>Density</b>                | 1.377 mg/m <sup>3</sup>                                         | 1.615 mg/m <sup>3</sup>                                       |
| <b>Absorption coefficient</b> | 0.201 mm <sup>-1</sup>                                          | 0.132 mm <sup>-1</sup>                                        |
| <b>F(000)</b>                 | 464                                                             | 292                                                           |
| <b>Index ranges</b>           | -12 ≤ h ≤ 12,<br>-13 ≤ k ≤ 13,<br>-14 ≤ l ≤ 14                  | -6 ≤ h ≤ 7,<br>-7 ≤ k ≤ 8,<br>-15 ≤ l ≤ 15                    |
| <b>R(int)</b>                 | 0.0307                                                          | 0.0518                                                        |
| <b>GOF on F<sup>2</sup></b>   | 0.839                                                           | 0.911                                                         |
| <b>Final R indices</b>        | R1 = 0.0496                                                     | R1 = 0.0652                                                   |
| <b>I&gt;2σ(I)</b>             | wR2 = 0.1339                                                    | wR2 = 0.1776                                                  |
| <b>R indices</b>              | R1 = 0.0711                                                     | R1 = 0.0867                                                   |
| <b>All data</b>               | wR2 = 0.1647                                                    | wR2 = 0.2016                                                  |
| <b>CCDC</b>                   | <b>1414989</b>                                                  | <b>1420474</b>                                                |
